# Supplementary material for: Functional Diversity of Human Basic Helix-Loop-Helix Transcription Factor TCF4 Isoforms Generated by Alternative 5′ Exon Usage and Splicing
Source: PubMed Central journal article supplement (PMC3137626; doi:10.1371/journal.pone.0022138), 2011-07-15
Supplement: pone.0022138.s001.pdf [file pone.0022138.s001.pdf]

TCF4-K MVTLVQHSHFSNSAHSGLDVYSITFLVDWHLGQRNNTMFSKRLEKIAQVPLLPFFIFIIILTNYSKMEGAVESQPSFFKTSQDIVTCTWVENCYSSFSRRPLEMESHSHVIQTGVQVHHLSSLQPP  
 TCF4-J MVTLVQHSHFSNSAHSGLDVYSITFLVDWHLGQRNNTMFSKRLEKIAQVPLLPFFIFIIILTNYSKMEGAVESQPSFFKTSQDIVTCTWVENCYSSFSRRPLE**QMFCKHQSKNIIISWTGMVAHTC**  
 TCF4-L MESHSHVIQTGVQVHHLSSLQPP

**AD1**

TCF4-K PPRFKLSSCLSLSTRDRRLCDFAKMHHQQRMAALGTDKELSDLLDFSAMFSPVSSGKNGPTSLASGHFTGSNVEDRSSSGSWGNGGHPSPSRNYGDGTPYDHMTSRDLGSHDNLSPFFVNS  
 TCF4-J **NPSTLGGQG**-----LCDFAKMHHQQRMAALGTDKELSDLLDFSAMFSPVSSGKNGPTSLASGHFTGSNVEDRSSSGSWGNGGHPSPSRNYGDGTPYDHMTSRDLGSHDNLSPFFVNS  
 TCF4-L PPRFKLSSCLSLSTRDRRLCDFAKMHHQQRMAALGTDKELSDLLDFSAMFSPVSSGKNGPTSLASGHFTGSNVEDRSSSGSWGNGGHPSPSRNYGDGTPYDHMTSRDLGSHDNLSPFFVNS  
 TCF4-B MHHQQRMAALGTDKELSDLLDFSAMFSPVSSGKNGPTSLASGHFTGSNVEDRSSSGSWGNGGHPSPSRNYGDGTPYDHMTSRDLGSHDNLSPFFVNS  
 TCF4-E **MQRAKTELFRLQIVT**DDLRKNEMFSPVSSGKNGPTSLASGHFTGSNVEDRSSSGSWGNGGHPSPSRNYGDGTPYDHMTSRDLGSHDNLSPFFVNS  
 TCF4-M **MRASKGSEGCQHAVTSQLVTGAGGDQTE**MFSPVSSGKNGPTSLASGHFTGSNVEDRSSSGSWGNGGHPSPSRNYGDGTPYDHMTSRDLGSHDNLSPFFVNS  
 TCF4-O **MLEREGVKERV**RMFSPVSSGKNGPTSLASGHFTGSNVEDRSSSGSWGNGGHPSPSRNYGDGTPYDHMTSRDLGSHDNLSPFFVNS  
 TCF4-P **MEMDIATFMAK**MFSPVSSGKNGPTSLASGHFTGSNVEDRSSSGSWGNGGHPSPSRNYGDGTPYDHMTSRDLGSHDNLSPFFVNS  
 TCF4-C MFSPVSSGKNGPTSLASGHFTGSNVEDRSSSGSWGNGGHPSPSRNYGDGTPYDHMTSRDLGSHDNLSPFFVNS  
 TCF4-N **MLKMFFRISQVAGSSWY**SKDVEDRSSSGSWGNGGHPSPSRNYGDGTPYDHMTSRDLGSHDNLSPFFVNS  
 TCF4-F **MEEDSRD**VEDRSSSGSWGNGGHPSPSRNYGDGTPYDHMTSRDLGSHDNLSPFFVNS  
 TCF4-R **MSIFEN**VEDRSSSGSWGNGGHPSPSRNYGDGTPYDHMTSRDLGSHDNLSPFFVNS  
 TCF4-Q MTSRDLGSHDNLSPFFVNS  
 TCF4-G **MKDIFFQFI IARVRKCYLSLCLHTLPV**

TCF4 RIQSKTERGSYSSYGRESNLQGCH**(1)**ELLGGDDMDMGNPGTSLPTKPGSQYYQYSSNNPRRRPLHSSAMEVQTKKVRKVPPLPSS**(2)**YAPSASTADYNRDSPGYPSSKPATSTFPSSFFMQDGH  
 TCF4-G **PTLR**KTERGSYSSYGRESNLQGCH**(1)**ELLGGDDMDMGNPGTSLPTKPGSQYYQYSSNNPRRRPLHSSAMEVQTKKVRKVPPLPSS**(2)**YAPSASTADYNRDSPGYPSSKPATSTFPSSFFMQDGH  
 TCF4-D MDMGNPGTSLPTKPGSQYYQYSSNNPRRRPLHSSAMEVQTKKVRKVPPLPSS**(2)**YAPSASTADYNRDSPGYPSSKPATSTFPSSFFMQDGH  
 TCF4-A **MYCAYTI**PGMGGNSLMYYINGKAVYAPSASTADYNRDSPGYPSSKPATSTFPSSFFMQDGH  
 TCF4-H **MKFKQCRCSDTGLCCLDHEGKAE**VYAPSASTADYNRDSPGYPSSKPATSTFPSSFFMQDGH  
 TCF4-I MQDGH

**NLS**

**AD2**

TCF4 HSSDPWSSSSGMNQPGYAGMLGNSSHIPQSSSYCSLHPHERLSYPSHSSADINSSLPFMSTFHRSNTGTHYSTSSCTPPANGTDSIMANRGSAGSSQTGDALGKALASIYSPDHTNNSFSSN

TCF4 **(3)** PSTPVGSPPLS**(3)**AGTAVWSRNGGQASSSPNYEGPLHSLQSRIEDRLERLDDAIHVLNRHAVGPSTAMPGGHGMHGIIGPSHNGAMGGLGSGYGTGLLSANRHSMLVGTHTREDGVALRGSHSL

TCF4 LPNQVPVQPLPVQSATSPDLNPPQDPYRGMPPGLQGQSVSSGSSEIKSDDEGDENLQDTKSSDKKLLDDDKDIKSI**(4)**TSRS**(4)**SNDDDLTPEQKAEREKERRMANNARERLRVRDINEAFKE **bHLH**

TCF4 LGRMVQLHLKSDKPQTKLLILHQAVAVILSLEQQVREERNLNPKAACLRREEEKVSEPPPLSLAGPHPGMGDASNHMGQM

Supporting Figure S1. Alignment of TCF4 isoforms. Amino acids different from the consensus are in blue, localization of functional domains is indicated with lines above the sequence. Amino acid(s) in parentheses are absent from (1) isoforms coded by transcripts spliced at acceptor II of exon 8, (2) Δ isoforms coded by transcripts without exons 8-9, (3) isoforms coded by transcripts spliced at acceptor II of exon 15, (4) – isoforms (as opposed to + isoforms) coded by transcripts spliced at donor I of exon 18. AD, activation domain; NLS, nuclear localization signal; bHLH, basic helix-loop-helix domain.
