# Supplementary material for: Functional Diversity of Human Basic Helix-Loop-Helix Transcription Factor TCF4 Isoforms Generated by Alternative 5′ Exon Usage and Splicing
Source: PubMed Central journal article supplement (PMC3137626; doi:10.1371/journal.pone.0022138), 2011-07-15
Supplement: pone.0022138.s002.pdf [file pone.0022138.s002.pdf]

Supporting Figure S2. Multiple alignment of *Homo sapiens* (h) genomic DNA regions containing *TCF4* 5' exons and internal exons 1-2 with the respective regions in *Pan troglodytes* (c), *Mus musculus* (m), *Rattus norvegicus* (r) and/or *Macaca mulatta* genomes (rh).

- The exons' names are given above each aligned region.
- The nucleotides in the aligned regions are numbered according to human genome assembly March 2006 NCBI36/hg18, chimp genome assembly March 2006 CGSC 2.1/panTro2, mouse genome assembly July 2007 NCBI37/mm9, rat genome assembly November 2004 Baylor 3.4/rn4 and rhesus genome assembly January 2006 MGSC merged 1.0 / rheMac2.
- The multiple alignments were produced with ClustalW program at <http://www.ebi.ac.uk/Tools/clustalw2/index.html>
- The percentages of identity were calculated between human *TCF4* 5' exon sequence and the respective mouse sequence using Needleman-Wunsch global alignment algorithm at <http://www.ebi.ac.uk/Tools/emboss/align/>.
- The **exon** sequences are in bold case.
- The **internal exons** are in blue.
- The sequences of primers used for expression analysis are underlined.
- Dotted blue lines above the sequences indicate the transposable elements as determined by RepeatMasker track in UCSC genome browser.
- The arabic numerals above exonic sequences indicate the number of human ESTs starting at the respective position and obtained from oligo-cap, cap-trapping and SMART libraries available in public databases through UCSC genome browser as of 3rd of November 2010.
- Possible in-frame translation **start codons** are shaded in gray. For each in-frame ATG codon translation start score calculated at <http://www.cbs.dtu.dk/services/NetStart> is shown above the start codon.
- When needed the locations of alternative splice donor sites are indicated with blue roman numerals (**I, II**) above the first intronic nucleotides (or above the first internal exon nucleotides in case of exon 7b-II).

## TCF4 exon 1a

### Aligned regions

h chr18:51482817-51483103  
c chr18:52061786-52062072  
rh chr18:48945911-48946209

note: exon 1a is located in ERV1 family LTR repeats containing region that is not conserved in mouse and rat; the position of both LTR12c and MER51a transposons is conserved in chimp, whereas only MER51a is present at this location in the rhesus macaque genome.

```
h CAGGCTGAGG--GAGCCGGCTCCCGCCTCGGCCATCCCAGGAAGGGGCTCCACAGTGCC
c CAGGCTGAGG--GAGCCGGCTCCCGCCTCGGCCATCCCAGGAAGGGGCTCCACAGTGCC
rh CAGTCTGTGTCAGTCTGATTAGTTGTTGAGGGGGCCATCAGAGGCTGAAACAAAGTT
*** ** * * * * * * * * * * * * * * * * * * * * * *
```

```
h GCGGCG---GGCTGAAGGGCTT--CTCAAGCGCCGCCAGAATTGGCA---CGGACGCCG
c GCGGCG---GGCTGAAGGGCTT--CTCAAGCGCCGCCAGAATTGGCA---CGGACGCCG
rh ACAAAGTTATACCCATGCAATCAACTGATTGGTTGTGAAAGTAACCAATCAGAGGCTG
* * * * * * * * * * * * * * * * * * * * * * *
```

```
h AGGAGGCATGAGAGCGAGCAAGGGCTCTGAGGGCTGCCAGCATGCTGTCACT--CTCAA ← LTR12c
c AGGAGGCATTAGAGCGAGCAAGGGCTCTGAGGACTGCCAGCATGCTGTCACT--CTCAA
rh AAGTGAAGTTACAAAGTTATACTCCTATAAAAATGAAGACTTGCCCAACACCAGCCTGA
* * * * * * * * * * * * * * * * * * * * * * *
```

```
h TTGGTTACAGGAGCAGGAGGGGACCAACAGAG ← MER51A
c TTGGTTACAGGAGCAGGAGGGGACCAACAGAGGTAAGTACTTTCAATTTTTTCATCTGCCTCAC
rh TTGGTTACAGGAGCAGGAGGGGAAAAAACAGAGGTAAGTACTTTCAAGTTTTTCATCTGCTGCAC
***** * * * * * * * * * * * * * * * * * * * * * *
```

```
h AGAAAAGGGGGAGGTTTTCAAAGGAAGTAGCCTCTGGTCTTTTGTGTTACGTGGGCTTGGAA
c AGAAAAGGGGGAGGTTTTCAAAGGAAGTAGCCTCTGGTCTTTTGTGTTACGTGGGCTTGGAA
rh AGAAAAGGGGGAGGTT-CAAAGGAATAGCTTCTGGTCTTCTGTTACATGGGCTTGGGA
***** * * * * * * * * * * * * * * * * * * * * * *
```

## TCF4 exon 1b

h chr18:51453879-51454330  
c chr18:52029997-52030448  
m chr18:69475444-69476010  
r chr18:65989132-65989715

exon 1b sequence identity between h and m: 49%  
note: exon 1b contains DNA transposon (MER5b) element.

```
h ATTAATTCTCTTGGCAAGAATCTTTCTCTTATCTTGTGTTTACAACAATGCCAACAGC
c ATTAATTCTCTTGGCAAGAATCTTTCTCTTATCTTGTGTTTACAACAATGCCAACAGC
m GCTAACTCTCTTGTACAATCTGTCCCAAACCTGACTGTTTTTGACAA-GCTACCAA
r ACTAAGTCTTTTGTACCAATCTGTTCCCAAACCTGACT--TTATAACAA-GCTATCAA
*** ** * * * * * * * * * * * * * * * * * * * * * *
```

```
h ATGCTGGGTTACACAGTAGACTCTTCCAGCTTTGCCATGGTAACACTTGTGCA---GCA
c ATGCTGGGTTACACAGTAGACTCTTCCAGCTTTGCCATGGTAACACTTGTGCA---GCA
m ATGCTAGGTTGTATC-----TTACAATGGTTGTGTTGTGAAAGAAGCC
r ATGCTAGCCTGTATCGTAGACTCTTTGAACTTCACGGTGGTTATAGACGCAAC---GCC
***** * * * * * * * * * * * * * * * * * * * * * *
```

```
h TTCTTTTCGAACAGTGCCATTCTCTTGATGTCTACAGTATCACCTTTCTTGTAGATTG
c TTCTTTTCGAACAGTGCCATTCTCTTGATGTCTACAGTATCACCTTTCTTGTAGATTG
m TTCTATTTGAAAAGTGCTCATTTCTTTGCTG-CTATAGATTGTCTTTGTTGGAGAGCT
r TTCTATTTGAAAAGTCCACTTCTTTGCTGGCCATAGGACTGCTTTTGTGAGAGCT
***** ** * * * * * * * * * * * * * * * * * * * * * *
```

```
h GCACTTATGCGGCCAAAGGAACAACCATGTTTTCTAAAAGGCTGGAGAAAATAGCACA
c GCACTTATGTGGCCAAAGGAACAACATCATGTTTTCTAAAAGGCTGGAGAAAATACCACA
m GTATGTGTAGAGCCGTTGGAATGAGTCCATGGTGTGTTGACAGGCCAAA-AGAACATTATT
r GTATACATAGAGCTAATGGAATGAGCCCATGATTTTTGTATAGGCCAG-----CATTATT
* * * * * * * * * * * * * * * * * * * * * * *
```

```

h      GGTGCCTCTCCTCTTTCCCTTCATCTTCATCATTTTGACAAAT--TACTCA-----
c      GGTGCCTCTCCTCTTTCCCTTCATCTTCATCATTTTGACAAAT--TACTCA-----
m      GGTACCTTACCTCTTTCCCTTTGTTCCCATCATTTCAGAGCAGTGGTCCCTCA-TCCTGTGG
r      GGTACTTTACCTCTTTCCCTTTTCTCCCATCATTTCAGAGAAGTGGTTCTCAACCCCATGG
          *** * * * *****
          0.386
          MER5B →
h      -----AAGATGGAGGG-----TGCAG---TTGAAAGCCAG
c      -----AAGATGGAGGT-----TGCAG---TTGAAAGCCAG
m      G-----CTCTGGGGTAGGGGGGGTTGGATGAGTCTTTTGCAGGAGTGGCATATCAG
r      GTCATGACTGCTTTGGGAGGAAGGGATTGAATGAGTCTTTTCACAGGGGTGGCATATCAG
          *      **      ***      * * *

h      -----TAAAACCTTC--TCAGGACATTGTAACATG---
c      GCAT---CATT---TTT-----CAAAACTTC--TCAGGACATTGCAACATG---
m      ATATTTACATTATGATTCAACAGTAGCAAAACTACAGTTAGGAAGTAGCAACAAAATC-
r      ATATTTACATCCCAACTTGTAAACAGTAGTAAAGATACAGATATAAAGTAGCAACAAG-TA
          **      ***      *      *** * *      * * * * *

h      -CACTTGGGTTGAGA---ACTGCTACTCGA---GCT-TCTCCAGGAG-----GCCCTTGG
c      -CATCGGGGTTGAGA---ACTGCTACTCGA---GCT-TCTCCAGGAG-----GCCCTTGG
m      ATTTTATAGTTGGGAGTACCATGGCCTGAGGAGCTGTATGAAAGGGC---AGCCTTTGG
r      ATATTATAGCTGGGAGTACCGTAGCATGA--AGCTATATTAAGGGCTGCAGCATTTGG
          * * * * * * * * * * * * * * * * * * * * * *

h      AGG-----TAGGAAC-----CAG-----
c      AGG-----TAAGAAC-----CAG-----
m      AAGGTTGA-GGCCGCTGATTATGAGGCGCTAAGAAAGTGGAGCATAACAGATGAAAATAAA
r      AAGGTTAATGATTGCAGGTTAAGAGGAGCTAAGAAGGTGGTGGGTGCAGATGAAAATAAA
          * *      ** ***      ***

h      -----CATTGGGCTACTTTAGCATCTTAGTAGAAACTGAAACCAA-A
c      -----CATTGGGCTACTTTAGCATCTTAGTAGAAACTGAAACCAA-A
m      GTA-CCGGTTTGA AACCTCTCAGGATACTTTAATGTCTAGCCAGAAGACAGAGCTATCA
r      GTATCCTTTTCAAAAACCTCTCAGGATATTTAATGTCAAGCCAGAAGACAGAACTATCA
          * *      ** * * * * * * * * * * * * * * *

```

**TCF4 exon 1**

**Aligned regions**

```

h      chr18:51449467-51449706
c      chr18:52025588-52025827
rh     chr18:48911757-48911996

```

note: internal exon 1 is located in SINE (AluSx) and LINE repeats containing region; this exon is used only together with 5' exon 1b.

```

h      CATTCTTCCCAGACTACCAGTACCATCTTCTAACTTGTCTACCTGCCTTCATTCTAAC
c      CATTCTTCCCAGACTACCAGTACCATCTTCTAACTTGTCTACCTGCCTTCATTCTAAC
rh     CATTCTTCCCAGACTACTAGTACCATCTTCTAACTTGTCTACCTGCCTTCATTCTAAC
          *****

h      ATGTCCACCATCTTTTCTCCACCCTGCAGCAAATGTTTTGTAAACACCAATCTAAGAACA
c      ATGTCCACCATCTTTTCTCCACCCTGCAGCAAATGTTTTGTAAACACCAATCTAAGAACG
rh     AAGTCCACCATCTTTTCTCCACGCTGCAGCGAATGTTTTCTAAACACCAATCTAAGAACA
          * *****

→ Line2B AluSx →
h      TTATCTCTTGGACGGGCATGGTGGCTCACACCTGTAATCCAGCACCTTGGGAGGCCAAG
c      TTATCTCTTGGACGGGCATGGTGGCTCACACCTGTAATCCAGCACCTTGGGAGGCCAAG
rh     TTATCTCTTGGACGGGCATGGTGGCTCACGCCCGCAATCCAGCACCTTGGGAGGCCAAG
          *****

h      GTAGGTGGATCACCTGAGGTCAGGTGTTCAAGACAGCCTGGCCAACATGATGAAATCCTG
c      GTAGGTGGATCACCTGAGGTCAGGTGTTCAAGACAGCCTGGCCAACATGATGAAATCCTG
rh     GTAGGTGGATCACCTGAAAGTCAGGTGTTCAAGACAGCCTGGCCAACATGATGAAATCCTG
          *****

```

## TCF4 exon 2

### Aligned regions

h chr18:53263228-53263515  
c chr18:51988836-51989124  
rh chr18:48870958-48871256

note: internal exon 2 is located in SINE (AluSz) repeat containing region.  
this exon is used only together with 5' exon 1b.

```

                                     AluSz ←
h          CATAGCTTTAAGTGACAGCCAATGCAATGAAGATTTCCATGTGCTGATTTTTTTCC----
c          CATAGCTTTAAGTGACAGCCAATGCAGTGAAGATTTCCATGTGCTGATTTTTTTCC----
rh         CATAGCTTTATGTGACAGCCAATGCAGAGAAGATTTGCATGTGCTGATTTTTTTTTTTTT
          *****
          0.537
          -----AGATGGAGTCTCATTCTGTTCATCCAGACCGGAGTGCAGTGGCACCATCTCAGC
h          -----AGATGGAGTCTCATTCTGTTCATCCAGACCGGAGTGCAGTGGCACCATCTCAGC
c          -----AGATGGAGTCTCATTCTGTTCATCCAGACCGGAGTGCAGTGGCACCATCTCAGC
rh         TTTTTTGAGATGGAGTCTTGTCTGTTCATCCAGACTGGAGTGCAGTGGCACCATCTCGCC
          *****

h          TCACTGCAACCTCCACCTCCCAGGTTCAAGCTATCCTCCTGCCTCAGCCTCCTGAGTACC
c          TCACTGCAACCTCCACCTCCCGGGTTCAAGCTATCCTCCCGCCTCAGCCTCCTGAGTACC
rh         TCACTGCAACCTCCACCTGCAGGGTTCAAGCTATTCTCCCGTCTCAGCCTCCTGAGTACC
          ***** * *****

h          CGGGATAGGCGTGAGTCACTCGAGGCTAATTTTTGTATTTTTAGTAGAGACGGGG-T
c          CGGGATAGGCGTGTGTCACTCGAGGCTAATTTTTGTATTTTTAGTAGAGACGGGGT
rh         TGGGATCGGCATGTGCCATCACTCCAAGCTAATTTTCATATTTTTAGTAGACACGGGG-T
          ***** ** * * ***** * *****

h          TTCACCACGTTGGCCAGGCTGGTCACGAACTCCTGACCTCAAGTGATCCACCCACCTCGG
c          TTCACCACGTTGGCCAGTCTGGTCACGAACTCCTGACCTCAAGTGATCCACCCACCTCGG
rh         TTCACCATGTTGGCCAGGCTGGTCACAACTCCTGACCTCAAGTGATCCACCCACCTCGG
          ***** *****


```

## TCF4 exon 3a

### Aligned regions

h chr18:51409263-51409608  
c chr18:51983884-51984229  
m chr18:69502792-69503123  
r chr18:66016648-66016980

exon 3a sequence identity between h and m: 70%

note: a SINE (MIR3) element is located upstream of this exon

```

h          CTAGAGGTAGAGCCAGTGAAT---TTCTCCTAACCCAACGTTTGTGATCTTTTCATTAC
c          CTAGAGGTAGAGCCAGTGAAT---TTCTCCTAACCCAACGTTTGTGATCTTTTCATTAC
m          TTGGAGGTAGAGCCAATGGAATATTTTTTCCACGCAATGCTTGTGATCTTTTCATTAC
r          TTGGAGGTAGAGCCGATGGAATATTTTTTCCAGCCAATGTTTTTGTGATCTTTTCATTAC
          ***** ** * * * * *

          ← MIR3
          1
h          A-----TCATCTAAGCAGAACCTGT-AGGGGTTAACTCTGAGAATGGGGATGATGC
c          A-----TCATCTAAGCAGAACCTGT-AGGGGTTAACTCTGAGAATGGGGATGATGC
m          A-GTGATTTTTTCCCCCAGAGCCTGTGAGGGCTTACTCTGAGAACCAGAGATAATGT
r          ATGATTTTTTTTTTCCAGAGCATGTCAAGGGCTTACTCTGAGAACCAGAGATAATGT
          * * * * *

h          TTGTGATAATGCAGCAAAAAGTAATGTCTAAATGTAAGATATTATTTTGAGATGAGAACA
c          TTGTGATAATGCAGCAAAAAGTAATGTCTAAATGTAAGATATTATTTTGAGATGAGAACA
m          CTGTGATAATGCACTATAAAGAGGTGGCTAAATGTAATAATTATTTTAGGATGAAAATG
r          CTGCGGTAATGCAGCATAAAGAGGTGGCTAAATGTAATAATTATTTTAGCATGCAAAATG
          ** * ***** * ***** ** *****

h          CCGAATGGGG-ATGGAAGACAGGAATCTTCACCATGTGTGAATGTACAGGAAACAACCAA
c          CCGAATGGGG-ATGGAAGACAGGAATCTTCACCATGTGTGAATGTACAGGAAACAACCAA
m          TGGAAATGGGGGATAAAACACTGGAGTCCATGATGTGTGAA-----ATAGCCCA
r          TGGAAATGGGGGATAAAACACTGGAATCTTCCTGATGTGTGAA-----ATAGCCCA
          ***** ** * * * * * ***** * * * *

```

```

h      TAAATGCCTTAATTCTTGTCTGTGTA AAAACTTACATGTAAGTAAAAGATCGCCGAAATTG
c      TAAATGCCTTAATTCTTGTCTGTGTA AAAACTTACATGTAAGTAAAAGATCGCCGAAATTG
m      TAAATGTCCCAATTCTTGTCTGTGTA AAAA-----ACTCTCAAGTAAAACATCTC-----
r      TAAATGTCCCAATTCTTGTCTGTGTA AAAA---ACTCTCAAGTAAAACATCTC-----
          ***** *      ***** *      *****      **      ***** * * *

```

```

h      ATCTGAACTCTGTTACTG-CCACAACTTTTATCAGCAAATGGAGATTAGGATGTTCCCA
c      ATCTGAACTCTGTTACTG-CCACAACTTTTATCAGCAAATGGAGATTAGGATGTTTCCA
m      -----AATTCTGTGCATGGGCCACGAGTTAAAATCAGAAGATAGAGATGAGGACGTTCTCA
r      -----AATTCTGTGACTG-CAGTGAATTTAAAATCAGAAAATAGAGATGAGTACGTTCTCA
          ** * * * * * * * * * * * * * * * * * * * * * * * * * * * * *

```

**TCF4 exon 3b**

**Aligned regions**

```

h      chr18:51407362-51408184
c      chr18:51981981-51982803
m      chr18:69504022-69504842
r      chr18:66017864-66018680
exon 3b sequence identity between h and m: 87%

```

```

h      CCGC-----TCCCGGAGGAGGCGTGGTCGACCAGCACCGCCATCTTGGCCGCTCTCTA
c      CCGC-----TCCCGGAGGAGGCGTGGTCGACCAGCACCGCCATCTTGGCCGCTCTCTA
m      CCGCCCTGGTTCCCGGAGGAGGCGTGGCTAGA-GCGCCGCCATCTTGGCCGCTCTCTA
r      CCGCCCCGGTTCCCGGAGGAGGCGTGGCTTAGC-GCGCCGCCATCTTGGCCGCTCTCTA
          ****      ***** *      ** ***** *****

```

```

h      GGCGCTCTGTTTACCACCTATAGGTCGCCCTGCTCCCGCCCCGCCCTTCCAGTCATTGT
c      GGCGCTCTGTTTACCACCTATAGGTCGCCCTGCTCCCGCCCCGCCCTTCCAGTCATTGT
m      GGCGCTCTGTTTACCACCTATAGGTCGCCCTGCTCCCGCCCCGCCCTTCCAGTCATTGT
r      GGCGCCGTGTTTACCACCTATAGGTCGCCCTGCTCCCGCCCCGCCCTTCCAGTCATTGT
          ***** ***** ***** ***** ***** *****

```

```

h      CTGGAGGAGCAGCCGCGGCCGAGCTCCTTCTCTTTATAAGCCCGCAGTTCCCCGGATGTG
c      CTGGAGGAGCAGCCGCGGCCGAGCTCCTTCTCTTTATAAGCCCGCAGTTCCCCGGATGTG
m      CTGGTGGAGCAGCCGCGGCCGAGCGCCTTCTCTTTATAAGCC-GCAGTGCCCGGATGTG
r      CTGGTGGAGCAGCCGCGGCCGAGCGCCTTCTCTTTATAAGCC-GCAGTGCCCGGATGTG
          **** ***** ***** ***** ***** *****

```

```

h      AATGGATTACAATGTATCTTTCAGGGAAACCTATTATTATCAATGTGACTCCACGGGGGA
c      AATGGATTACAATGTATCTTTCAGGGAAACCTATTATTATCAATGTGACTCCACGGGGGA
m      AATGGATTACAATGTATCTTTCAGGGAAACCTATTATTATCAATGTGACTCCTCGGGGGA
r      AATGGATTACAATGTATCTTTCAGGGAAACCTATTATTATCAATGTGACTCCTCGGGGGA
          ***** ***** ***** ***** ***** *****

```

```

h      GTCCATGGTGATGATGATGAGGAGGAGGATGATGATGATGAGACACCTCTAAACTTGAA
c      GTCCATGGTGATGATGATGAGGAGGAGGATGATGATGATGAGACACCTCTAAACTTGAA
m      GTCAATGATGGTGTGG-----GGAGGAGGATGATGATGAGACGCCTCTAAACTTGAA
r      GTCAATGATGGTGTGA-----GGATGATGATGATGATGAGACGCCTCTAAACTTGAA
          *** ** * * * * *      *** * ***** *****

```

```

h      CAAGTTTAAGACTTTATGAGAGAAGA-----AAAAAATCACCAACAAGAATTGTTTGAG
c      CAAGTTTAAGACTTTATGAGAGAAGA-----AAAAAATCACCAACAAGAATTGTTTGAG
m      CAAGTTTAGGACTTTGAAAGAGAAGAGAAAAAATAACAACAAGA-----CCGAA
r      CAAGTTTAGGACTTTGAAAGAGAAGA-----AAAAAATACAACAACAAGA-----CCGAA
          ***** * * * * *      ***** * ***** * *

```

```

h      GAAAAATTATAACTATCCTGTGTTTCAATTTTTTTTTTTTATAAACAATAAGAAAAAGTTGTT
c      GAAAAATTATAACTATCCTGTGTTGATTTTTTTT--TATAAACAATAAGAAAAAGTTGTT
m      GAACAATTATAACTATCCAGTGTGATTATTTTTT--ATAACAATACGAAAAAGTTGTC
r      GAACAATTATAACTATCCTGTGTTGATTATTTTTT--ATAACAATAAGAAAAAGTTGTC
          *** ***** ***** * * * * *      ***** *****

```

```

h      GGATTTTTTTTT--AATGATTTCTTTTTTGGGGGAGGGAATTTTGTTCAGTTTTATGGT
c      GGATTTTTTTTTTAAATGATTTCTTTTTTGGGGGAGGGAATTTTGTTCAGTTTTATGGT
m      GGATTTTTTTTTTAAATGATTTCTTTTTTGGGGGAGGGAATTTTGTTCAGTTTTATGGT
r      GGATTTTTTTTTT--ATGATTTCTTTTTTGGGGGAGGGAATTTTGTTCAGTTTTATGGT
          ***** ***** ***** ***** ***** ***** * * *

```

h **GGAAAATGCAAAAACCAGAGCCAGGTGCATAATCTTGTAACTCTGTGGATATCCCTGGAGC**  
c GGAAAATGCAAAAACCAGAGCCAGGTGCATAATCTTGTAACTCTGTGGATATCCCTGGAGC  
m GGAAAATGCAAAAACC-GAGCCAGGTGCATAATCTTGTAACTCTGTGGCTAACCCCTGGAAC  
r GGAAAATGCAAAAACCAGAGCCAAGTGCATAATCTTGTAACTCTGTGGCTAACCCCTGGAAC  
\*\*\*\*\* \* \* \* \*\*\*\*\* \* \* \* \* \* 1

h **AGGACTGAGTACCAGTTAAAATACTTTTT---GGGGATACACATGTGAGATACTAAGTAC**  
c AGGACTGAGTACCAGTTAAAATACTTTTT---GGGGATACACATGTGAGATACTAAGTAC  
m AGGACTGACTTCTATTTAAAATACTTTTTGGGGGAACACTCATGTGAGACACTAAGTTC  
r AGGACTGACTACTATTTAAAATACTTTTTGGGGGAATACACATGTGAGATACTAAGTAC  
\*\*\*\*\* \* \* \* \*\*\*\*\* \* \* \* \* \* 1

h **TTGCAGAAGATTTTTGTCTCTCTTTTTAAAGTCTCTTTCCTTGGAATATTGTGAGAATAT**  
c TTGCAGAAGATTTTTGTCTCTCTTTTTAAAGTCTCTTTCCTTGGAATATTGTGAGAATAT  
m TTGCAGAAGATTTTTGTCTCTCTTTTTAAAGTCTCTTTCCTTGGAATATTGTGAGCATAT  
r TTGCAGAAGATTTTTGTCTCTCTTTTTAAAGTCTCTTTCCTTGGAATATTGTGAGCATAT  
\*\*\*\*\* \* \* \* \*\*\*\*\* \* \* \* \* \*

h **TTGTGGCCATTTAAGGTAACGTTTCAATTTGCCGTGACAGTAAACTGTTTGTAAATTGAAT**  
c TTGTGGCCATTTAAGGTAACGTTTCAATTTGCCGTGACAGTAAACTGTTTGTAAATTGAAT  
m TTGTGGCCATTTAAGGTAACGTTTCAATTTGCCGTGACAGTAAACTGTTTGTAAATTGAAC  
r TTGTGGCCATTTAAGGTAACGTTTCAATTTGCCGTGACAGTAAACTGTTTGTAAATTGAAC  
\*\*\*\*\* \* \* \* \*\*\*\*\* \* \* \* \* \*

h TTAATTTTTAAAATGTCGAT-CCCGATGTTTTATTAAAACAAAAGGGACAACCTATTAAA  
c TTAATTTTTAAAATGTCGAT-CCCGATGTTTTATTAAAACAAAAGGGACAACCTATTAAA  
m TGAATCTTAGAATGTTGAG-CCCAATGTTTTATTCAAACAAAAGGAACAACCTATTAAA  
r TGAATTTTAGAATGTTGATGCCAATGTTTTATTCAAACAAAAGGAACAACCGATTAAA  
\* \* \* \* \* \* \* \* \* \* \* \* \* \* \* \* \* \* \* \* \* \* \* \* \* \* \* \* \* \* \* \* \* \* \* \* \* \* \* \*

h TAATTGCCAATGGGAAAAGTGTGTGCATGCATTTTGTGTATGACTCGCACATCTAGCA  
c TAATTGCCAATGAGAAAAGTGTGTGCATGCATTTTGTGTATGACTCGCACATCTAGCA  
m TAATTGCCAGTGGGAAAACGTTGTGTGCATGCATTTCC-GTACGTACTCGTACATTTAGCA  
r TAATTGCCAGTGGGCAAACGTTGTGTGCATGCATTTCC-GTGGCTACTCGCACATTTAGCA  
\*\*\*\*\* \* \* \* \*\*\*\*\* \* \* \* \* \* \* \* \* \* \* \* \* \* \* \* \* \* \* \* \* \* \*

**TCF4 exons 3c, 3d**

**Aligned regions**

h chr18:51406110-51407003  
c chr18:51980740-51981619  
m chr18:69505196-69506161  
r chr18:66019053-66020010  
exon 3c sequence identity between h and m: 63%  
exon 3d sequence identity between h and m: 80%

h TCG-CCCCAACGCAAACTACCGAAACGAAA-ATCTCCC-CAGGAAA--TGTGGCTTG  
c TCG-CCCCAACGCAAACTACCGAAACGAAA-ATCTCCC-CAGGAAA--TGTGGCTTG  
m TCGGCCCCAACGCAAACTATCCAACAAAATATCCCC-TAGTAAAA-TGTGGATGG  
r TCGGCCCCAACGCAAACTATCCAACAAAATATCCCCCTAGTAAAAATGTGGATGG  
\*\*\* \* \* \* \*\*\*\*\* \* \* \* \* \* \* \* \* \* \* \* \* \* \* \* \* \* \* \* \* \* \*

h ATTTATAGACGAAAAAGAAAAATATTGTTCCCTCTTGGCAAAGTCTTTTTGCATCACGTGT  
c ATTTATAGACGAAAAAGAAAAATATTGTTCCCTTTTGGCAAAGTCTTTTTGCATCACGTGT  
m GTTTCTGTATGAAAAAGAAAAATATTGTTCCGTCTTGGCAAAGTCTTTATGCATCACGTGT  
r CTTTCTGTATGAAAAAGAAAAATATTATTCGTCTTGGCAAAGTCTTTATGCATCACGTGT  
\*\*\* \* \* \* \*\*\*\*\* \* \* \* \* \* \* \* \* \* \* \* \* \* \* \* \* \* \* \* \* \* \*

h 1 2 1  
**ATTTGCAGCCTAGTATAAACTTGCTTTGCCGTGTGTGGATGTGTG-----**  
c ATTTGCAGCCTAGTATAAACTTGCTTTGCCGTGTGTGGATGTGTG-----  
m ATTTGCAGCAAAGCA-AAACTTGCTTTGCAGTGTGTGTGTGTGTGTGTGTGTGTGTGTGT  
r ATTTGCAGCAAAGCA-AAACTTGCTTTGCAGTGTGTGTGTGTGTGTGTGTGTGTGTGTGTGT  
\*\*\*\*\* \* \* \* \*\*\*\*\* \* \* \* \* \* \* \* \* \* \* \* \* \* \* \* \* \* \* \* \* \* \*

h -----**AGTGAGAGGGAACGAGAGTAAGAGAAAGAAA**-----  
c -----AGTGAGAGGGAACGAGAGTAAGAGAAAGAAA-----  
m GTGTGTGTGTGTGTGA--GAGAGAGAGAGAGAGAGAGAGAGAGAGAGAGAGAGAGAGAGAG  
r GTGTGTGTGTGTGTGTGTGTGTGTGTGTGTGTGTGTGTGTGTGTGTGTGTGTGTGTGTGTGT  
\* \* \* \* \* \* \* \* \* \* \* \* \* \* \* \* \* \* \* \* \* \* \* \* \* \* \* \* \* \* \* \* \* \* \* \* \* \* \* \*

```

h -----GAAGTGAG--GGGATGTAAACTCGAATAAATTC
c -----AGTGAG--GGGATGTAAACTCGAATAAATTC
m TACAGAGAC--ACAGAGAGACAGACAGAAGTGAGAAGGGATGTAAACTCGAATGAATTC
r TACAGAGACAGACAGAGAGACAGACAGAAGTGAGAGGGGATGTAAACTCGAATCAATTC
          *****

```

1

```

h AAAGTGCCCTCCGAGGGATGCAACGGGCAAAAACACTGAACTGTTCAGGCTTCAGATTGTAAC
c AAAGTGCCCTCCGAGGGATGCAACGGGCAAAAACACTGAACTGTTTCAGGCTTCAGATTGTAAC
m AAAGTGCCCTCCGATGGATGAACCCGGCAAACCCCTGAACTGTTTCAGGCTTCAGATTGTAAC
r AAAGTGCCCTCCGGTGGATGAACCCGGCAAATCCTCAACTGTTTCAGGCTTCAGATTGTAAC
          *****

```

```

h TGACGATCTGAGG--AAAAATGAGGTGCTCGATGAATTTTCGTTTGTA-----
c TGACGATCTGAGG--AAAAATGAGGTGCTCGATGAATTTTCGTTTGTA-----
m TGGCGATCTGAGGGGAAAATGAGGTGCTCGGTGAATTTTCCTTGGTGGGTTTTTTTTTT
r TGGCGATCTGAGGGGAAAATGAGGTGCTGGGTGAATTTTCCTTGGTGGGTTTTGTTTTT
          **

```

```

h -----TTTTTTGGCGAGGCGGGGGAGGTGTTGAGATTTTTTTTTTTTCCCTCGGGGT
c -----TTTTTTGGCGAGGCGGGGGAGGTGTTGAGATTTTTTTTTTTT-CCCCTCGGGGT
m CCCCTCTCTCTTTCTCAAGACGGGGGAGGTGTTGGGATTTTT----TTTCT----GGGGT
r T---TTTTTCTTCTCGAGACGGGGGAGGTGTTGGGATTTTTTTTTTTTCT---GGGGT
          * **

```

```

h GGGTGCGAGGGGATGCATCTTAGCCTGCCGACCCGGAGCAAGTCGCGTCTCCCGGCCG
c GGGTGCGAGGGGATGCATCTTAGCCTGCCGACCCGGAGCAAGTCGCGTCTCCCGGCCG
m GGG-----GGTGTTCAGGCGAGCCGGGCGGAGC--GCCGCGTCTCCCGGCCG
r GGG-----GGTGTTCAGGCGAGCCGACCCGGAGC--GCCGCGTCTCCCGGCCG
          ***
h GAGCCCCCCCACCCATTTCTTTGCTGAACCTGCAATTCGCTGCGCCTCGCGTGTTC
c GAGCCCCCCCACCCATTTCTTTGCTGAACCTGCAATTCGCTGCGCCTCGCGTGTTC
m GAGCCCCCCCACCCATTTCTTTGCTGAACCTGCAATTCGCTGCGCCTCGCGTGTTC
r GAGCCCCCCCACCCATTTCTTTGCTGAACCTGCAATTCGCTGCGCCTCGCGTGTTC
          *****

```

1 1 1

```

h CCTCCCCCTTCCCTCCGTCCTCCCTCCCCGGAGAAGAGAGTGGTGTAAAGAGTCA
c CCTCCCCCTTCCCTCCGTCCTCCCTCCCCGGAGAAGAGAGTGGTGTAAAGAGTCA
m CCTCCCCCTTCCCTC-GTCCCTCCCTCCCCGGAGAAGAGAGTGGTGTAAAGAGTCA
r CCTCCCCCTTCCCTC-GTCCCTCCCTCCCCGGAGAAGAGAGTGGTGTAAAGAGTCA
          *****

```

2 2 1

```

h GGGATCTTGGCTGTGTGTCTGCGGATCTGTAGTGGCGGCGGCGGCGGCGGCGG----
c GGGATCTTGGCTGTGTGTCTGCGGATCTGTAGTGGCGGCG-----GCGGCGG----
m GGGATCTTGGCTGTGTGTCTGCGGATCTGCGGCGGCGGCGGCGGCGGCGGCGGCGG
r GGGATCTTGGCTGTGTGTCTGCGGATCTGCGGCGGCGGCGGCGGCGGCGGCGGCGG
          *****

```

3

```

h -----GGAGGC---AGCAGGCGCGGGAGCGGGC-GCAGGAGCAGGCGGCGGCGG
c -----GGAGGC---AGCAGGCGCGGGAGCGGGC-GCAGGAGCAGGCGGCGGCGG
m AGCGGCGGTGGGAAGCCGAAGCGGGCGGGCGCCGCGCTTGGAGGAGGTGGTGGTGG
r -----GGAAGCCGAGCGGGCGGGCGCCGCGCTTGGAGGAGGTGGTGGTGG
          ***

```

```

h TGGCGGC-GGCGGTTAGACATGAACGCCGCTCGGCGCGGCGGCTGCACGGAGAGCCCT
c TGGCGGC-GGCGGTTAGACATGAACGCCGCTCGGCGCGGCGGCTGCACGGAGAGCCCT
m CGGAGGCAGGGGATAGACATGACCGCCGCTGGGCGCGGCGCTGCACGGAGAGCCCT
r CGGAGGCAGGGGATAGACATGACCGCCGCTGGGCGCGGCGCTGCACGGAGAGCCCT
          ***

```

```

h TCTCGCGCGGGCGGTAGGTACCGGCCCTGCGGGGCTCGGCGGGGCGGAGGCGCCCGG
c TCTCGCGCGGGCGGTAGGTACCGGCCCGGCGGGGCTCGGCGGGGCGGAGGCGCCCGG
m CGTCCGCGCGGGCGGTAGGTAGCGGCGC-GGCGGGGCGGCTGGGCGGATGCGC--GG
r CGTCCGCGCGGGCGGTAGGTAGCGGCGC-GGCGGGGCGGCTGGGCGGATGCGC--GG
          *****

```







```

h          CTGGCTCAA GTATGTAAATCTTTTCTTAGTGT-TAAGTTAAATGTTCTGGGCTGTTTAT
c          CTGGCTCAAGTATGTAAATCTTTTCTTAGTGT-TAAGTTAAATGTTCTGGGCTGTTTAT
m          CTGGCTCAAGTACGTGAATCTTTTCTTGGTGTGAAGTTCAATGGTCTCAGTTGTTTAT
r          CGGGCTCAAGTACGTGAATCTTTTCTTGGTGT-GAAGTTCAATGTTCTGGGTTGTTTAT
          * ***** ** ***** ** * ***** ** * ***** ** * *****

h          TTA CTCAATTGTATGTTTTGGCTCTGTTGAAGAGTTCTGAAA-AAGTCATTGAATTTTA
c          TTA CTCAATTGTATGTTTTGGCTCTGTTGAAGAGTTCTGAAA-AAGTCATTGAATTTTA
m          TTGCTCT-TTGTGTATTTTGGCTCTGTTGGAGTGTTCGAAAAGAAGTCATTGAGTTTTA
r          TTGCTCT-TTGTGTATTTTGGCTCTGTTGGAGTGTTCGAAAAGAAGTCATTGAGTTTTA
          ** ** * ** * ***** ** * ***** ** * ***** ** * *****

```

**TCF4 exon 5a (I,II)**

**Aligned regions**

```

h          chr18:51364943-51365292
c          chr18:51938781-51939130
m          chr18:69544313-69544647
r          chr18:66056297-66056645
exon 5a sequence identity between h and m: 79%

```

```

h          GAATCTGTCTGGAATCGGCGCGGAAC TTTGGAGAATGTTTTCTCCTCAGGAGCTGGAAC T
c          GAATCTGTCTGGAATCGGCGCGGAAC TTTGGAGAATGTTTTCTCCTCAGGAGCTGGAAC T
m          GAATCTGTCTGCAACCAGCAGGGTGCAC TGGGTG-CG-TGGTCTCCTCAGGAGCTGGGTCT
r          GAATCTGTCTGGAACCAGCGGGGCGCA TTGGGTACCAATTGCTCCTCAGGAGCTGGGCCT
          ***** ** * ** ** * ** * * ** * ** * ** * ** * ** *

```

```

h          CAACTCTTCTCA-GCC CACA-CAATGCAGGATCTGTGGTTTTCTGTCCCTGTTTCTTTT
c          CAACTCTTCTCA-GCC CACA-CAATGCAGGATCTGTGGTTTTCTGTCCCTGTTTCTTTT
m          CCACACACCC----ACCC TCC---GCGCAGGATCCCAGAT-----CTCCTTTTCTCT
r          CCACCCCTCCCGACACCCACCTCACTGCTGGATCTGAGAT-----CTAGTTTCTTT
          * * * * * ** * ** * ** * ** * ** * ** * ** * ** * ** *

```

1

```

h          TCTCCATTTTT CTCCCC TCACTTACTCTGATTGATGGAAAACAGTGCT--GGGAGCTTT
c          TCTCCATTTTTCTCCCC TCACTTACTCTGATTGATGGAAAACAGTGCT--GGGAGCTTT
m          TCTC--TTTCCCCTCCCTTCCCTGGCTCTGATTGATGGAGACACAGTGCT-GGAGAGCTCT
r          TCTCTCTTTCCCCTCCCTTCACTTGCTCTGATTGATGGAAAACAGTGCCCGGGAGCTTT
          **** * ** * ***** ** ***** ***** * *****

```

I

**0.260**

```

h          CCCTGACATTTCTTTCCAAAGACTGAAAGTAAGAAATGTTATGGTGGTG-----CTATGT
c          CCCTGACATTTCTTTCCAAAGACTGAAAGTAAGAAATGTTATGGTGGTG-----CTATGT
m          TCCTGACAACTTTCCCAACACGGAGAGAGGGAGATGCTATGGTGGTGGTG--CTGGCT
r          CCCTGACAACTTTCCCAACACGAGAAAGAGGAGATGCTATGGTGGTGGTGGTGCTGGGT
          ***** ** * ** * ** * ** * ** * ** * ** * ** *

```

II

```

h          CTATTTTTGAAAAGTAAGTCTGTTAACGTAAAGCCTGTGTGATATATTGGGATGAATTAT
c          CTATTTTTGAAAAGTAAGTCTGTTAACGTAAAGCCTGTGTGATATATTGGGATGAATTAT
m          CTATTTTTGAAAAGAAGACTGTTAATGTAAAGCCGGTGTGATATATTCCGGTGAATTAT
r          CTATTTTTGAAAAGAAGGCTGTTAATGTAAAGCCGGTGTGATATATTCCG-TGAATTAT
          ***** ** * ***** ***** ***** ***** ** *****

```

```

h          AATGGTGATATTATTACAGCCTTCAAAGCTGAAAATTTATTTTCTCACCTACTTTT
c          AATGGTGATATTATTACAGCCTTCAAAGCTGAAAATTTATTTTCTCACCTACTTTT
m          AATGGGGATATTATTACAGCCTTCAAAGCTGAAAATGTATTATTTTCTCACCTACTTT-
r          AATGGGGTATTATTACAGCCTTCAAAGCTGAAAATGTATTATTTTCTCACCTACTTT-
          ***** * ***** ***** ***** ***** *****

```

## TCF4 exon 5b

### Aligned regions

h chr18:51328689-51329127  
c chr18:51902034-51902472  
m chr18:69575418-69575840  
r chr18:66088428-66088869  
exon 5b sequence identity between h and m: 53%

```
h TATTTTATTTTGTTCAGAAAAGGTCTGCTATTGTTCAAATTTCTAAT--GTAGCTCAT
c TATTTTATTTTGTTCAGAAAAGGTCTGCTATTGTTCAAATTTCTAAT--GTAGCTCAT
m TAGTTTATTTTGTTCGCGTAAAGGTCTTCTATTGTTCTGATTTCTAACTCGCGGCTCAC
r TATTTTATTTTGTTCGCGTAAAGGTCTGCTATTGTTCTGATTTCTAAT--GCGGCTCAT
** ***** * * ***** ***** ***** * *****
```

```
h AAACACACAGCCAGTATCATTTCCCCTTCTACTGACTGATATATACAAATAAATTAATAAAT
c AAACACACAGCCAGTATCATTTCCCCTTCTACTGACTGATATATACAAATAAATTAATAAAT
m AAACACACAGTCCATATCCTCTCCCCTTCTCCTGACTGATGTGTAC-AATAAATGAAAAC
r AAACACACAGCCAATATCCTCTCCCCTTCTCGTACTGATGTATACCAACAAATGAAAAT
***** * **** * ***** ***** * **** * **** * ****
```

```
h CTACGG-----TCATCATTAACTCATGTTCTGTTTCCATGGAGCACAGGAGAG
c CTACGG-----TCATCATTAGCTCATGTTCTGTTTCCATGGAGCACAGGAGAG
m CTCCAG-----TCATCGTCATTAGTCAGAGTTCCTGCTCTGTGAAGGGTAGAAAAG
r CTCCCGCCGCCGCGTCTATCATCTTTAGTCAGAGATCGGTGTCTATGGACGGTAGGAAA
** * * * * * * * * * * * * * * * * * * * * * * * * * * * *
```

```
h TAACAAGGAAGGCCCT-TAAAAGAAAGGCCTTTTAA-AGTGGAGGT-CTCAGTTCACAA
c TAACAAGGAAGGCCCT-TAAAAGAAAGGCCTTTTAA-AGTGGAGGT-CTCAGTTCACAA
m GAACAAGGGAGACTTCTCAGAAGAAAGTCCCTTTGAGAGCAGTGGTTCAGCCTGTAG
r CAACAAGGGAGAGTCCCT-CAGAAGAAAGTCCCTCTGAGAGCAGTGATTCTCAACCTGTGG
***** * * * * * * * * * * * * * * * * * * * * * * * * * * * *
```

```
h ACTTTAAAAGTTTACGAAGTAGTATTTTAGA-ATT-----TTAA--TCACC
c ACTTTAAAAGTTTACGAAGTAGTATTTTAGA-ATT-----TTAA--TCACC
m GTCGAGACCCCTTTGGTGGCTGAATATCAGATA-----TTAGTGTTACA
r GTCGTGACCCCTCCGGTGGCTGCGTGTGATAGCCAGCTTATCAGAAATTAGTGT-GCC
* * * * * * * * * * * * * * * * * * * * * * * * * * * *
```

0.379

```
h AGATATATTGGGGGAATTTATTACTTCCATTTCATATGGAAGAGGACAGCAGAGGTAAT
c AGATATATTGGGGGAATTTATTACTTCCATTTCATATGGAAGAGGACAGCAGAGGTAAT
m ACACATGGCAGTAGCAAG-ATTGCC----ATT--ATGAAGTAG--CAACACAAATAATT
r ATACAT--CGGTAGCAAG-ATCACA----GTT--ATGAAGCAG--CAGTAAAAATAATT
* * * * * * * * * * * * * * * * * * * * * * * * * * * *
```

```
h ATTTATGTAAGTGTATTTTAAAAGCTTACTCTTGATTAAAATGTTTGATCTATCGACTT
c ATTTATGTAAGTGTATTTTAAAAGCTTACTCTTGATTAAAATGTTTGATCTATCGACTT
m --TTATGA-----CTGGGGGGTCA-CCACAACACAGGGGACTGTTTAAAAGGGA-
r --TTATGA-----TGGGGGGTCA-CCACAACCCAGGGAAGTGTATAA-GGGT-
***** * * * * * * * * * * * * * * * * * * * * * * * * * * * *
```

```
h CTGTATCCTTAGAAGTTTGA----ATTGCTGGACATATTTGACTGGGGTTTTTA--CAA
c CTGAATCCTTAGAAGTTTGA----ATTGCTGGACATATTTGACTGGGGTTTTTA--CAA
m CATAGCATTGGAAGGTTGAGAGACTGCTG-----TGGAGGGAGATTCTTATCCGT
r CAGAGCATTGGAAGGTTGAGAGCCACTGCTA-----TAGAAGGAGATTCTAATCCAC
* * * * * * * * * * * * * * * * * * * * * * * * * * * *
```

## TCF4 exon 5c

### Aligned regions

h chr18:51298148-51298550  
c chr18:51871746-51872156  
m chr18:69605796-69606177  
r chr18:66119076-66119463

exon 5c sequence identity between h and m: 57%

note: exon 5c is located in SINE (MIRb) element containing region.

```

                                     MIRb ←
h TAATATCCTCCCCCGCCCCCGCTTTTTTTTTTTTTTTTTTTGGAGTTCCTACTGTG
c TAGTATCCTCCCCCGCCCCCGCTTTTTTTTTTTTTTTTTT-----GAGTTCCTACTGTG
m TAATAAAATG----GGAGTTATGTCTATACAGTTAT-----AA-TCCTACTATG
r TAATAAAATG----GGAGTTATACCTATAGATTTTT-----AGCTCCTACTACG
  ** ** * * * * * * * * * * * * * * * * * * * * * *
                                     2 1
h TTCCAGGTCCATGGTAACATTTTCCTTGTATCTGTAATCATCACAACGACTGGAGG
c TTCCAGGTCCATGGTAACATTTTCCTTGTATCTGTAATCATCACAACGACTGGAGG
m TTCCAGGTTTATGGCAACACTTTCC-----CTATACCTTTCATGACAAT-CCAGAGA
r TTCAAGGTTTCATGGTAACACTTTCC-----CTATACTTTTCACAACAGT-CCAGAGA
  *** ** * * * * * * * * * * * * * * * * * * * * * *
                                     0.367
h GTAAATACGGTCATTCCCATTTTAC-AGATGAGGATACATTCAATGT-GAGATGTTAAAG
c GTAAATACGGTCATTCCCATTTTAC-AGATGAGGATACATTCAATGT-GAGATGTTAAAG
m GCAGAAGCAGTGACTCCCATTTTGTGGATGAGAATCCATACAGTAT-GAGATATCAAAA
r GGACAAGCAGTCCTTACCATTTTGTGGATGAGACGCCATACAGTACAGATATCAAAA
  * * * * * * * * * * * * * * * * * * * * * * * * * * * *
  0.389
h ATGTTCTCAGAATTTCCAGGTAGCAGGCAGCTCA-----TGGTATTCA
c ACGTTCTCAGAATTGCCAGGTAGCAGGCAGCTCACCACACCACCATGGGTGGTATTCA
m ATGTCCCCCAG--TTGTCCGCAAAGCAGGCAGCTCCGCACACTCTCGTGGGTGGTGTCTG
r AGGTCCCTCAA--TTGTCCGCAAAGCAGGCAGGTAGTACACTCTCGTGGGTGGTGTGGG
  * * * * * * * * * * * * * * * * * * * * * * * * * * * *
                                     ♦
h AAAGGTAATGGTTAAGAGAAAAGAATGGATAATGAATATCTGTGTCTATTTTCTTGAGAC
c AAAGGTAATGGTTAAGAGAAAAGAATGGATAATGAATATCTGTGTCTATTTTCTTGAGAC
m GAAGGTAATGGT--GGAAGGCGACA----CTAAATGCATTCTGTTTGTCTTCTTGAGAC
r AAAGGTAATGGT--GGAACGGCGATAGATCCTAAATGCATTCTGTTTATTTTCTTGAGAC
  * * * * * * * * * * * * * * * * * * * * * * * * * * * *
h AGACGAGACTGAGCAGCCTGAGAACATTTGGTGCTCAGAGGGAGGAAATGCTAAGAGGGG
c AGACGAGACTGAGCAGCCTGAGAACATTTGGTGCTCAGAGGGAGGAAATGCTAAGAGGGG
m AGCC-----TGAGCAGCCTGAGAACATTTGGTGCTCAGAGGGAGGAAAGCCTGAGAGGGG
r AGAC-----TGAGCAGCCTGAGAACATTTGGTGCTCAGAGGGAGGAAAGTCTGAGAGGGG
  ** * * * * * * * * * * * * * * * * * * * * * * * * * * * *
h AAAACAAGTCTGAAAGGAAAAGAAGGATAGTTCAAAGACCAGTTTCCCCTGCTTCAGAAT
c AAAACAAGTCTGAAAGGAAAAGAAGGATAGTTCAAAGACCAGTTTCCCCTGCTTCACAAT
m AAAACAAGTCTGAGTGG-AAAGGAGGTAGTTCAAAGACCAGTTTCCCCTGCTTCACCGT
r AAAACAAGTCTGAATGG-GAAGGAGGAGAGTTCAAAGACCAGTTTCCCCTGCGTCGTCGT
  * * * * * * * * * * * * * * * * * * * * * * * * * * * *

```

## TCF4 exons 7a (I, II, III)

### Aligned regions

h chr18:51240265-51240881  
c chr18:51813659-51814272  
m chr18:69660167-69660803  
r chr18:66174462-66175075

exon 7a sequence identity between h and m: 76%

```

h AACTTTTCAGGGAAGAAAAAAA--CACACACACACACTAAAAGCACCAGATGCAAATTA
c AACTTTTCAGGGAAGAAAAAAA--CACACACACACACTAAAAGCACCAGATGCAAATTA
m AACTTTTCAGGGAAGAAAAAAAACACACACACACACTAAAAGCACCAGATGCAAATTA
r AACTTTTCAGGGAAGAAAAAAA--CACACACACACACTAAAAGCACCAGATGCAAATTA
  * * * * * * * * * * * * * * * * * * * * * * * * * * * *

```

```

h      TGGTAGGGAGTCTT--TAACTCTTTAAACCACCCCCCTAAATTTCCATCATAGGAAACAT
c      TGGTAGGGAGTCTT--TAACTCTTTAAACCACCCCCCTAAATTTCCATCACAGGAAACAT
m      TGGTAGGGAGTCTTTTTAACTCTTTAAACAACCCCCCTAAATTTCCATCCGAGGAAACAC
r      TGGTAGGGAGTCTTTTTAACTCTTTAAACAACCCCCCTAAATTTCCATCGGAGGAAACAC
          *****  *****
          1                               2
h      GT-GAT--GAGTGTTAGCCTAAGAACTAGATTCTC-----TTTTTTTTTAATAAT
c      GT-GAT--GAGTGTTAGCCTAAGAACTAGATTCTC-----TTTTTTTTTAATAAT
m      GTCGGTTGGAGTGTTAGCCTAAGAGCAAGTTCTTTATGATTATTATTTTTTTTTTAATGAC
r      GTCGGTCGGAGTGTTAGCCTAAGAGCTAGTTTTTTATAATFACTATTTTTTTTTTAATGAC
          ** * *  ***** * * * *
          1                               2
h      AG---GAAAGTACTTTTTATTGTGACCCAAGTATGAGAATTTCTGGCAAACTTTTTTTT
c      AG---GAAAGTACTTTTTATTGTGACCCAAGTATGAGAATTTCTGGCAAACTTTTTTTT
m      AGCAACGAGAGTGCTTTTTATTGTGGCCCAAGTATGAGATATTCTAATAAACTTTTTTT-
r      AGCAATGAAAGTGCTTTTTATTGTGGCCCAAGTATGAGAAATCTAACAACTTTTTTT--
          **   ** * * *  *****  ***** * * * *

h      TAATATTAATAAAAAAAC----CCCC---AAACCCTCCACCTTTTCCCTTCTTTTCCTTTTC
c      -AATATTAATAAAAAAAC----CCCCA---AAACCCTCCACCTTTTCCCTTCTTTTCCTTTTC
m      -AACATTAATAAAAAAATAAAGCCCCATATGACCCCTCCACCTTTTTGTTTCTTTTCCTTTTC
r      -AATATTAATAAAAAAATAAAGCCCCATGTGACCCCTCCACCTTTTTGTTTCTTTTCCTTTTC
          ** *****  **** * *****  *****

h      CCTTTCAAGACTATTTAAATGTACATAGTAAAACATGTTAGGACAGCCAAGCCCCAGCAT
c      CCTTTCAAGACTATTTAAATGTACATAGTAAAACATGTTAGGACAGCCAAGCCCCAGCAT
m      CCTTTTAAGACTATTTAAATTTACATAGTAAAACACGTCAGGACAGCCAAGCCG--GCGT
r      CCTTTCAAGACTATTTAAATTTACATAGTAAAACATGTCAGGACAGCCAAGCCC--GCGT
          ***** ***** * * ***** * * *

h      GTTGTGTTCTGTCTCTGGCTGGCAGATTCAGCCACAACAGTTTATTCATCCACATGCT
c      GTTGTGTTCTGTCTCTGGCTGGCAGATTCAGCCACAACAGTTTATTCATCCACATGCT
m      GTTCTGTCTGTCTCTCGG-CTGGCACAGTGACACCACAACACTTTATTCCTCCACATGAT
r      GTTCTGTCTGTCTCTGGATCTGGCTCACTGACACCACAACACTTTATTCCTCCACATGAT
          *** *****  ***** * * *****  ***** *

h      TTTTGGCGACTCTTTCATCAGTATTGGGCTTAGATCTTCTGGTGCCCTCCCTCGGCGTGC
c      TTTTGGCGACTCTTTCATCAGTATTGGGCTTAGATCTTCTGGTGCCCTCCCTCGGCGTGC
m      TTT-GGCGACTCTGCCTCATGTATTAGTGCT-----GGTGCCCTCCCTCTGCCTGC
r      TTT-GGCGACTCTGCCTCACGAATTAGAGCT-----GGTGCCCTCCCTCTGCCTGC
          *** ***** * * * * * * * ***** * * * *

          I           II           III
h      TACCATAAGGTCGAAAGAAAAGCAAGTATTCG-ATTTCTCTATTCCAGGTGGGTTTTTT
c      TACCATAAGGTCGAAAGAAAAGCAAGTATTCG-ATTTCTCTATTCCAGGTGGGTTTTTT
m      CGCCCAGAAGCCCGAAGAAAAGCAAGTACCCC-GTTTCTCT--TTAGGGTGGGCTTTTG
r      CGCCCAGAAGCCCGAAGAAAAGCAAGTACCCCGTTTCTCC--TCAGGGTGGGCTTT-G
          ***** * * * ***** * ***** * ***** * *

h      TTTTTTTTTTTTTTTTTGGAT--GATAGTGGTTTTTTTTTTTT-----TT--GTGCTTT
c      TTTTTTTTTTTTTTT---TGGAT--GATAGTGGTTTTTTTTTTTT-----TTTTGCGCTTT
m      TTTGGTCTTGTTG--TGCGTTTAGATACTGTGTTGCCACCCACCCACCCCATGCTCT
r      TTCGGTTTTGCTG--TGCGTTTAGATATTGCTTTTTCC-----CTGAATGCTTC
          ** * * * * * * * * * * * * * * * * * *

h      TT-CTTTTAATCTATTCCCTTTGTGGTTAG-TGTAAGAGTTTGGAGAATGTGCCATAA
c      TT-CTTTTAATCTATTCCCTTTGTGGTTAG-TGTAAGAGTTTGGAGAATGTGCCATAA
m      TTACTTTCTAACCTGTTCCTTTGCGGTTAGCTA-GAGGTTTGGAGAACCAGCCCTTCA
r      TTACTTTCTAACCTGTTCCTTTGCGGTTAGCTGCGAGGTTTGGAGACCCTGCCATGCA
          ** ***** * * ***** * * * * * * * * * * * *

```

# TCF4 exons 7b (I,II), 7

## Aligned regions

h chr18:51221530-51222336  
c chr18:51794937-51795741  
m chr18:69679014-69679822  
r chr18:66192823-66193608  
exon 7b sequence identity between h and m: 86%

h GTAGGCAATTTTCAAAGCCCTGTTTCCCAAATGTAAATTCATCATCA-TCTTGATCA  
c GTAGGCAATTTTCAAAGCCCTGTTTCCCAAATGTAAATTCATCATCA-TCTTGATCA  
m ATAGGTAATTTCCCAA-ACCCCTTTCCCAAGGGG---GCCCATCACTGCTGCTGG  
r CTAGGTGACTTCTCAA-GCCCTTTCCCAAGTGTG---CCCT-----  
\*\*\*\* \* \*\* \* \*\* \*\*\* \*\*\*\*\* \* \*

h TGATGGGGTTCACCTCCTGGG-AAAGGGAGTTTTTAAAAAAGAG-AGAGAGAG-----  
c TGATGGGGTTCACCTCCTGGG-AAAGGGAGTTTTTAAAAAAGAG-AGAGAGAG-----  
m TAATGGGGATCACTCCTGGGAAAGGGAGTTTTTGAAGGGAGGAGAGCAGTGGGGGG  
r -----GGATCAGTCTGGGAAAGGGAGTTTTTAAAGGGAGGAGAGAGAGGTGGGGGG  
\*\* \*\*\* \*\*\*\*\* \*\*\*\*\* \*\* \*\*\* \*\*\*\*\*

2

h -AGAGACTCAGAATTTGAATAGTTTCTTTGCTAAATTCACCATCTGGAGAGCCTGTGAT  
c -AG--ACTCAGAATTTGAATAGTTTCTTTGCTAAATTCACCATCTGGAGAGCCTGTGAT  
m AAGGGTCTTAGAATTTGAACAGTTTCTTTGCGAGATTACCATCTGGAGAGCCCATGAT  
r AGGGGGCTTAGAATTTGAACAGTTTCTTTGCTAAATTCACCATCTGGAGAACCATGAT  
\* \*\* \*\*\*\*\* \* \*\*\*\*\* \*\* \*\*\*\*\*

h **TGATTAGTTTGGCCTCACTATTAAGTGTCAATATAATCAATGGGAATTACTAGGCTAGG**  
c TGATTAGTTTGGCCTCACTATTAAGTGTCAATATAATCAATGGGAATTACTAGGCTAGG  
m TGATTAGCTTTGGCCTCCCTGTTAAGTGTCAATATAATCAATGGGAAGTACCAGGCTAGG  
r TGATTAGCCTTTGGCCTCCCTGTTAAGTGTCAATATAATCAATGGGAAGTACCAGGCTAGG  
\*\*\*\*\* \*\*\*\*\* \* \*\*\*\*\* \* \* \*\*\*\*\*

h **GTCATTACATAGATAAATTTGCCTGCTGTGTAATAAAAAATGAAATTGTTAAATTTTGTG**  
c GTCATTACATAGATAAATTTGCCTGCTGTGTAATAAAAAATGAAATTGTTAAATTTTGTG  
m GTCATTACATAGATCATTTGCCTGCTGTGTAATAAAGATGAAATGGTCCAAATTTTGGC  
r GTCATTACATAGATCATTTGCCTGCTGTGTAATAAAAAGTAAATGGTTCAAATTTGGTG  
\*\*\*\*\* \*\*\*\*\* \*\*\*\*\* \* \* \*\*\*\*\* \* \*

h **CAAGAGAAAG---TGAAAATAA--GGAGTTACGATTTGTTGTTA-GAGAAAGTGGAGG**  
c CAAGAGAAAG---TGAAAATAA--GGAGTTACGATTTGTTGTTA-GAGAAAGTGGAGG  
m AGAGAGAGAGAACGTGAAAAACA--GGAGTGACAATTTGTTGTTAAGAGAAAGTGGAGG  
r AGAGAGGAAGAACGTGAAAAAAAAGGAATGACAATTTGTTGTTA-GAGAAAGTGGAGG  
\*\*\*\* \* \*\*\*\*\* \* \*\* \* \* \*\*\*\*\* \*\*\*\*\*

1

11

2

1

0.514

h **CCATTGGAATGACAGTTTTTGAAGTGTGGAGCAGTTTGCTAAGAATAGGAATGAAGGA**  
c CCATTGGAATGACAGTTTTTGAAGTGTGGAGCAGTTTGCTAAGAATAGGAATGAAGGA  
m CCTCTGGAATGACAGTTTTTGAAGTGTGGAGCAGTTTGCTAAGAATAGGAATGAAGGA  
r CCACTGGAATGACAGTTTTTGAAGTGTGGAGCAGTTTGCTAAGAATAGGAATGAAGGA  
\*\* \*\*\*\*\* \*\*\*\*\* \*\*\*\*\* \*

h **TATTTTTTTT-CCAGTTTATCATAGCCAGAGTGAGGAAGTGTATTCCCTCTCTTGTCTGC**  
c TATTTTTTTT-CCAGTTTATCATAGCCAGAGTGAGGAAGTGTATTCCCTCTCTTGTCTGC  
m TATTTTTTTTCCAGTTTCTTGTGCGCCAGAGTGAGGAAGCGCCATTCCCTGTCTTGTCTGC  
r TATTTTTTTT-CCAGTTCTTGTGCGCCAGAGTGAGGAAGCGCCATTCCCTGTCTTGTCTGC  
\*\*\*\*\* \*\*\*\*\* \* \* \*\*\*\*\* \* \*\*\*\*\* \*\*\*\*\*

11

2

I 1

h **ATACATTGCCAGTAGTGCCTACTTTACGTATGTAAACATCGGGGAAGAGCAGTAGATGTC**  
c ATACATTGCCAGTAGTGCCTACTTTACGTATGTAAACATCGGGGAAGAGCAGTAGATGTC  
m ATACATTGCCAGTTGTGCTCCCTACGTATGTAAACATCGGAGCTGGGAGTGGATCTC  
r ATACATTGCCAGTTGTGCTCCTCTACGTATGTAAACATCGGAGATGGGGAGTGGATCTC  
\*\*\*\*\* \*\*\*\*\* \* \* \*\*\*\*\* \*\*\*\*\* \* \* \* \* \* \* \* \*

h **TGTTACCTG--GAGGAGATTTTTTTTTAAGGAAAAACACAATTTACACTTTTTTGTCTGTT**  
c TGTTACCTG--GAGGAGATTTTTTTTTAAGGAAAAACACAATTTACACTTTTTTGTCTGTT  
m TGTTACCTGCAGGGGAGTTTGTCTTTAGAGGAAAAGCAGATTTCATCTGTTCTGTTGTT  
r AGTTACCTGCAGGGGAGTTTGTCTTTAAGGAAAAGCAGATTATCTGTTTATTGTT  
\*\*\*\*\* \* \*\* \* \*\* \* \*\* \*\*\*\*\* \* \* \* \* \* \* \* \*

II

h TCTCTTGGCAGGTAAAACAGAAAGGGGCTCATACTCATCTTATGGGAGAGAATCAAACCTT
c TCTCTTGGCAGGTAAAACAGAAAGGGGCTCATACTCATCTTATGGGAGAGAATCAAACCTT
m TCTCTTGGCAGGTAAAACAGAAAGGGGCTCATACTCATCTTATGGGAGAGAA--AACGT
r TCTCTCGGCAGGTAAAACAGAAAGGGGTCATACTCATCTTATGGGAGAGAA--AACGT
\*\*\*\*\*

h ACAGGGTTGCCACCAGGTAAGTGAGAATCTCTGT-TGCGGAAGGGTTGAGAGGATTAACC
c ACAGGGTTGCCACCAGGTAAGTGAGAATCTCTGT-TGCGGAAGGGTTGAGAGGATTAACC
m TCAGGGTTGCCACCAGGTAAGTCCCACATT-GGGCTGGGACGAGGTGAGAGGGCTAACC
r ACAGGGTTGCCACCAGGTAAGTCCCACCTCTCGGTCTGGGGAAGAGGTGCCAGAACTAAGG
\*\*\*\*\*

h TGGTAAATCA--GTTTGTTTTCTAAATTAGATGATGCATTTTAAACTGTGACACCAAAGA
c TGGTAAATCA--GTTTGTTTTCTAAATTAGATGATGCATTTTAAACTGTGACACCAAAGA
m ATGGAAATGATGCTGCCTT-----GCTTTCAGTGGTGACACTGAAGG
r AGGGAAATGGT-GCCTGTCTT-----GCTCTCAGTTGTGATACTAAAGG
\* \* \* \* \*

h TGCACCGCAAG--TCAGA-----TGATGGCTCTCTCTTAAAGTAATGAAATAACACAG
c TGCACCGCAAG--TCAGA-----TGATGGCTCTCTCTTAAAGTAATGAAATAACACAG
m ---CCAGGAGGGTTGAGAGTCTCCTGATGGCTGTCT--TTAAGGAATGAGGCAAACCGG
r ---ACAGGAGGGCTGAGAGCCTC-TGACGGCTGTCT--TTAAGGAACGAAGCAAATCGG
\* \* \* \* \*

TCF4 exons 8a, 8b (I,II) and 8c (I,II)

Aligned regions

h chr18:51219075-51220606
c chr18:51792487-51794015
m chr18:69680798-69682354
r chr18:66194620-66196287
exon 8a sequence identity between h and m: 83%
exon 8b sequence identity between h and m: 79%
exon 8c sequence identity between h and m: 69%

h AA--ATGTAAGCAAAGTTTGTGTTTTGTAATTAATCGAGCCTATGAGGAAAGTTTCCTT
c AA--ATGTAAGCAAAGTTTGTGTTTTGTAATTAATCGAGCCTATGAGGAAAGTTTCCTT
m ACCCATGTAAGCCCACATGTGCTTCAGTAA----CTGGGCAC-TGAGGGAAGTCTCTGT
r AAC-ACGTAAGCCCACATGTGCCTCAGTAATGTAACCTGGGCAC-TGAAGGAAGTTTTCCT
\* \* \* \* \*

h TAC-GTACCAGACAT-----AGGAAGGTACGACTTCTGGTGGGTTGGT-----GTGTT
c TAC-GTACCAGACAT-----AGGAAGGTACGACTTCTGGTGGGTTGGT-----GTGTT
m ACCAGGAGCGCTCATTTCTCATGAAGGTA-GAATTCTGGAGGATTGGTCTGGACGGGTT
r TCCAGGAGCACCCGTTGATCATGAAGGTA-GAATTCTGGAGGATTGGTCTGGAAGGGTT
\* \* \* \* \*

h TGTTTTT---TCCCTG-----TATATATTTGCATTTTTAAAGTTTACTCCCTTGCCCCA
c TGTTTTT---TCCCTG-----TATATATTTGCATTTTTAAAGTTTACTCCCTTGCCCCA
m TTCTTTCCCTCCCGCTGCTGTATATATTTGCATTTTTAAAGTTTAACTCCTCTGGCCCCA
r TTCTTTCCCTCCCGCGG---TATATATTTGCATTTTTAAAGTTGACTCCTCTGGTCCA
\* \* \* \* \*

h GCCACCAATTCAGTCATATTC-GGCATCTGAAAGATTGTTGCATTGAGGTGAACAGTGC
c GCCACCAATTCAGTCATATTC-GGCATCTGAAAGATTGTTGCATTGAGGTGAACAGTGC
m GTTGCCAATTCAGTCATACTCCAGCATCTAAAAGATTGTTGCGATGAGCAGCGCAGCTC
r GTTGCCAATTCAGTCATCTCCAGCATCTAAAAGATTGTTGCGGATGAGCTGCACAGCTC
\* \* \* \* \*

h TTGGTTAAGAGCTCCTGCCGAGTG-CAGTTCATGGCAGTTGTTTGGAAAGAATTCTGC
c TTGGTTAAGAGCTCCTGCCGAGTG-CAGTTCATGGCAGTTGTTTGGAAAGAATTCTGC
m TGGGTTGAGAACTCTCGCAGGAGGGCAGCCCATGGCAGTCTGTGTGGAAAGAATTCTGC
r TTGGTTGAGAAGTCTTCCAGGAGGG-CAGCCCATGGCAGTTGTTGTGGAAAGAATTCTGC
\* \* \* \* \*

h AGGAAAGAAATTTACAGCCATTCCAGCGCAACGGAAACATCTTTGGAATGTGAGTGCAAA  
c AGGAAAGAAATTTACAGCCATTCCAGCGCAACGGAAACATCTTTGGAATGTGAGTGCAAA  
m AGGAAAGAAACTTACAGCCATTCCAGTGAACGGAAACATCTTTGGAATGTGAGTGCAAA  
r AGGAAAGAAATTTACAGCCATTCTGGTGAACGGAAACATCTTTGGAATGTGAGTGCAAC  
\*\*\* \*\*

h TGTTTCGGGCTAGATAGCCTGGGGCACAAGCCTCTG-AGTGTGTGTCTCTGGTGTAAA-G  
c TGTTTCGGGCTAGATAGCCTGGGGCACAAGCCTCTG-AGTGTGTGTCTCTGGTGTAAA-G  
m TGTTTCGGGGCAGATAGCCTGGGCAACCAGCC-TGACAGAGCTGGGTCTCGGGTGTAAAAG  
r TGTTTCGGGGCAGATAGCCTGGGCAACCAGCCCTTACAGCGCTGGGTCTCTGGTGTATA-G  
\*\*\*\*\* \*\*

h CTCTCAGTTCCTGCAGAAGACCGTGTTCCTGTGGGTCTGGTTTCTGAGGGTCAAGGCGGA  
c CTCTCAGTTCCTGCAGAAGACCGTGTTCCTGTGGGTCTGGTTTCTGAGGGTCAAGGCGGA  
m CTCTCAGTTCCTGCAGAAAAGCCGGTTCCTGTGGGTCTGGTTTCTGAGGGTCAAGGCGGA  
r CTCTCAGTTCCTGCAGAAAAGCCGGTTCCTGTGGGTCTGGTTTCTGAGGGTCAAGGCGGA  
\*\*\*\*\* \*\*

h GGTCATTAGAGTTTTGGGGAGAAGAAAGTTGACAACA---TCCTTCCTTTCTGCAGATGG  
c GGTCATTAGAGTTTTGGGGAGAAGAAAGTTGACAACA---TCCTTCCTTTCTGCAGATGG  
m GGTCGCCAGAGTTTTGGGGAGAAGAAAGTTAACAACAGCATCCTTCCTCTTGCAGATGG  
r GGTCGCCAGAGTTTTGGGGAGAAGAAAGTTAACAACA---TCCTTCCTTTCTGCAGATGG  
\*\*\*\*\* \*\*

1  
h TCATGGCAGAGGTCTCTG-----TTTTCGCTGGGCCCTTTTTCTGGTCATTGAGAGAA  
c TCATGGCAGAGGTCTCTG-----TTTTCGCTGGGCCCTTTTTCTGGTCATTGAGAGAA  
m CCGAGGCACAGGTCTCTAGCTTTTTTCCGCTGGGGCCCTTTGCTGGTCATTGAGAGAA  
r TCATGGCAGAGGTCTCTA-----TTTTTCGCTGGGCCCTTTTCTGGTCATTGAGAGAA  
\* \*\*

1 11 1  
h TAGGCTTCCTCACCCCTGTATCCTTTCTACTAATAGGAATTGGCGTGATTCCTCACAGA  
c TAGGCTTCCTCGCCCTGTATCCTTTCTACTAATAGGAATTGGCGTGATTCCTCACAGA  
m TAGGCTTCCTAGACCCTGTATCCTTTCTACTAATAGGCATTGGCATGATTCCTCACAGA  
r TAGGCTTCCTAGACCCTGCATCCTTTCTTGCTAACAGAAATTGGCATAATTCCTCACAGA  
\*\*\*\*\* \*\*

1  
h CACAAAGATTTCTCTGCTGAGTAAGCGTGAGGCCCTTAACTTGTGAAAGCATCATCCA  
c CACAAAGATTTCTCTGCTGAGTAAGCGTGAGGCCCTTAACTTGTGAAAGCATCATCCA  
m CACAGAGATTTCTCTGCTGAGTAAGCCAGAGGTCCCTGAACTTGGGAAAGCATCATCCA  
r CACAGAGATTTCTCTGCTGAGTAAGCCAGAGGTCCCTGAACTTGGGAAAGCATCATCCA  
\*\*\*\*\* \*\*

I  
1 3 1 1  
h GACCGTGTGAGTCTGTCTGTGTATGTGCAGAACACAGACCCTCCTTTCTCCGT-----  
c GACCGTGTGAGTCTGTCTGTGTATGTGCAGAACACAGACCCTCCTTTCTCCGT-----  
m GACCTTGGGAGTAAATGTGTGTA----CAGAGCGAGTCCCTTCTCCCTCCGT-----  
r GACCGTGGGAGTCAGTGTGTGTA----CAGAGCGAGTCCCTTCTCCCTCCGTGTTTTTT  
\*\*\*\*\* \*\*

h -----TTGT---GGG  
c -----TTGT---GGG  
m -----TTTTCTTT-----TTTTCTTTT---GG  
r TTTTTGTTTTTTTTGGGGGGGGTGTGTTGTTGTTGTTGGGTTTTTTTTTCCAGGG  
\*\* \* \*\*

h GAATACTTCCTCGGGTGAAGTGAAGTAAATTTTTTTTTT-----TTTTCCAAC  
c GAATACTTCCTCGGGTGAAGTGAAGTAAATTTTTTTTTT-----TTT---CAAC  
m GAATACTTCCTCGG-TGAAACTGAA-----CTTTTTTTTGTGTTTGTGTTT---CAAC  
r GAATACTTCCTCGG-TGAAACTGAA-----CTTTTTTTTT-----TT---CAAGC  
\*\*\*\*\* \*\*

II 1  
h ACAAGGTGAGAAGTGAAAGGGGCAGAGGGTGAAGAGAGGTGGATGGATTG--GCATGT  
c ACAAGGTGAGAAGTGAAAGGGGCAGAGGGTGAAGAGAGGTGGATGGATTG--GCATGT  
m ACAAGGTGAG-AGTGAATGGGATGTGGG-GGATTTGAGGTGG-TTGCTGGAGTGTGT  
r ACAAGGTGAGGAGTGGAGTGGACATGGGG-GGAATTGAGGTGG-TCGACTGGAGTGTGT  
\*\*\*\*\* \*\*



I

```

h GATGGCTGAATTTCTGGGCCTTGGGAGGTTTCGTTTTGAGGCATTAATGTCCAGGAAAATT
c GATGGCTGAATTTCTGGGCCTTGGGAGGTTTCGTTTTGAGGCATTAATGTCCAGGAAAATT
m GAAGGCTAAAATGTCGGG-----AG--CTTGA---AG---CTGCTATTCAGGAAAAC
r GAGGGCTGAAAT-TCGGG-----GGGCCTTCACT---AG---TTGCTCTTCAGGAAAATG
  ** **** * * * * * * * * * * * * * * * * * * * * * * *

```

```

h CTTTTGTATATAGCACTATGACTGCATATGCTTTTCTTAAAAAGCCTTCGTAATGTAGCC
c ATTTTGTATATAGCACTATGACTGCATATGCTTTTCTTAAAAAGCCTTCGTAATGTAGCC
m CTTTTTC-TATA---TCAGGGCTGT---TGCTTTTCTTGAGAGGCCGTGAGAATCTTGCT
r CTTTT-C-TATC---CCAGGGCCGT---TGCTTTTCTTGAGAGATCTTCAGAATCTTGCT
  **** * * * * * * * * * * * * * * * * * * * * * * *

```

```

h GTGG-AGTGTGGAGATTCCTTCACTTAAATTTGTGCTTCATGGTTGTGAGTCTTGCAAG
c GTGG-AGTGTGGAGATTCCTTCACTTAAATTTGTGCTTCATGGTTGTGAGTCTTGCAAG
m GGGGAGTGTGGCGCAGCCTTCTTCTTAGTTC-TGCTTCAGGCATGCGAGTCTTTCGAG
r GGGG-AGTGTGGCGCTGACT-CCTTCTTAGTTC-TGCCTCAGGCTTGCAGCCTTGCAG
  * * * * * * * * * * * * * * * * * * * * * * * * * *

```

```

h AGTCTACTATCTCTGT-----GCTTAGCGTGGTTCGAGCAAT-----CTCCATAAACAG
c AGTCTACTATCTCTGT-----GCTTAGCGTGGTTCGAGCAAT-----CTCCATAAACAG
m CAATGGCTATCTGTGC-----GCTCAGCTAGGTCTTAGCTGC-GTCCACCTAGAAAACCG
r AAATGGCTATCTGTGCCTGCGCGCTCAGCTAGGTCTTAGCTGTTGCCACCCATATACAG
  * * * * * * * * * * * * * * * * * * * * * * * * * *

```

```

h TGTGATTACTTAGGGATAAAATAAAGTGAAATTTGGAAATTTGCTGACAGAGGGAAAAAT
c TGTGATTACTTAGGGATAAAATAAAGTGAAATTTGGAAATTTGCTGACAGAGGGAAAA-T
m TGTGAT-GCTCAAGGGTATCTCGAGG-GAAATGCTGAGACTTCCCTG-CGTGGGGAAA-C
r TGCGAT-GCTCAAGGGTGTCCCCTGG-GGAATGTTGAGAATTCCTG-TGTGGGGAAA-T
  ** *** * * * * * * * * * * * * * * * * * * * * * * *

```

1

```

h AGGGACTGAAGATGAAAA-ATGTACAGAGTATGAATTTCTGCTTTCTGTGAAATTTGAGA
c AGGGACTGAAGATGAAAA-ATGTACAGAGTATGAATTTCTGCTTTCTGTGAAATTTGAGA
m AGGGCTTGAGGGTGAGGATGCGTAAGCAGTCTGGATTTGAGGTTCTGTGGAATTCGAGA
r AGGGCTTGAAAGATAAGAGTGTGTACATAGTCTGGATTTGAGCTTTCTGTGGAATTCGAG
  **** * * * * * * * * * * * * * * * * * * * * * * *

```

1

```

h ATAGAACAGACCATAGTGTGT-CTTCCAGTGAATCAGTTTCTTGTGCCGTATTGTTAT
c ATAGAACAGACCATAGTGTGT-CTTCCAGTGAATCAGTTTCTTGTGCCGTATTGTTAT
m AAAGAGCAGAGCAGAGTTTGT-CTCTCAGGGAGTCGGTTTCTCTGGAGCTGCCTTGTCT
r AAAGAGCAGGGCGAAGTTTGTCTCTCAGGGAGTCGGTTTCTCTGGCGCTGCATTGTCT
  * * * * * * * * * * * * * * * * * * * * * * * * * *

```

```

h TTGAATCCCTGTCTACAACATCAGCTATGCAAACCAAAGAGAAAGCCAAATCTCAGTAT
c TTGAATCCCTGTCTACAACATCAGCTATGCAAACCAAAGAGAAAGCCAAATCTCAGTAT
m TTGAACCCCTGTCTACTACTTTGAGCTAAACAAACCCCAAAGAAAGCCAGAATCCCGCGT
r TTGAACCCCTGTCTACTACTTTGTGCTAAACAAACCCCAAAGAAAGCCAGAATCCCGGTGT
  ***** * * * * * * * * * * * * * * * * * * * * * *

```

1

```

h C-----TTGGGCTTCAAGTCTAAATAGCAGATCACAGCTGAAATGATCCCCACTGTGT
c C-----TTGGGCTTCAAGTCTAAATAGCAGATCACAGCTGAAATGATTTCCCACTGTGT
m C-----TTGTGCTCGGAGTCTAAATAGCAGATCACAGCTGAAATGATTTCCCACTGTGG
r CGGTGTCTTGGGCTTGGAGTCTTAGTAGCGGATCACAGCTGAAATGATTTCCCGCTGTGT
  * * * * * * * * * * * * * * * * * * * * * * * * * *

```

II

```

h GACAAGGTGAGT-----GACTCGT-----
c GACAAGGTGAGT-----GACTCGT-----
m AACAAAGGTGAGT-----GACT-GTCT-----
r AACAAAGGTGAGTCTCAGTCTGTCTGTCT-GTCTGTTTCTCTCTCTCTCTCTCTCTCT
  ***** * * * *

```

```

h -----GGAGGGGAGGCTTTTGTTTTCTT
c -----GGAGGGGAGGCTTTTGTTTTCTT
m -----CTCTTGGGAAGGGGAGCTTTTGTTTGCTC
r TCTCTCTCTCTCTCTCTCTCTCTCTCTCTCTCTCTCTCTCTCTCTCTCTCTCTCTCTCT
  *** ** * * * * * * * * *

```

```

h      CTGTTTACTACATGATTGAGATACGGAATAGGAAACCTTCAGATGGTGTGCCCTAAGGAG
c      CTGTTTACTACATGATTGAGATACGGAATAGGAAACCTTCAGATGGTGTGCCCTAAGGAG
m      C-GTTTGCCA-ACTAGTGAGATGCTGGACAGAAAACCTTTAGATGGAGTAACCCAGGAG
r      C-ATTCGCCA-GCTAGTGAGTCCCTGGACAGAAAACCTTTACATGGGGTAGTCCCAGGAG
          *  **  *  *      *  ****  *  *  *  **  *****  *  *****  *  *  *****
h      CTCCAAAAGCTGCTTTATCGTATTATAACAGTGTA-TCCTATGGACTTAAAGGGGTGAGC
c      CTCCAAAAGCTGCTTTATCGTATTATAACAGTGTA-TCCTATGGACTTAAAGGGGTGAGC
m      CTGCAAAAAGCTGCTTTTCATATGATAACAATGTA-GCCTGTGAACCTAAAGGGATGAGC
r      CTGCAAAA-GCTGCCTTTTCATATGATAACAATGTAAGCCTGTGAACCCAAAGGGATGGGC
          **  *****  *****  **  *  *  **  *****  *****  ***  **  *  *  *****  *  *  **

```

**TCF4 exon 8d**

**Aligned regions**

```

h      chr18:51169899-51170366
c      chr18:51742009-51742476
m      chr18:69722547-69723022
r      chr18:66238485-66238964
exon 8d sequence identity between h and m: 95%

```

```

h      GGGGCAGAGTCATAATTGGCCTATTTAGAGTATTTTGCATGTGAATAGTGTGTTAGTGAA
c      GGGGCAGAGTCATAATTGGCCTATTTAGAGTATTTTGCATGTGAATAGTGTGTTAGTGAA
m      GGGGCAGAGTCATAATTGGCCTATTTAGAGTATTTTGCATGTGAATAGTGTGTTAGTGAA
r      GGGGCAGAGTCATAATTGGCCTATTTAGAGTATTTTGCATGTGAATAGTGTGTTAGTGAA
          *****

```

```

h      GCATCCCTAAGTCTGTTGTGAGTGACATGGTGATTAGAATTTAGATTAGGGAAAACACAT
c      GCATCCCTAAGTCTGTTGTGAGTGACATGGTGATTAGAATTTAGATTAGGGAAAACACAT
m      GCATCCCTAAGTCTGTTGTGAGTGACATGGTGATTAGAATTTAGATTAGGGAAAACACGT
r      GCATCCCTAAGTCTGTTGTGAGTGACACGGTGATTAGAATTTAGATTAGGGAAAACACAT
          *****

```

1 1

```

h      TCTGTACTTTATCAAGGACAGTAATTAGTTCAGTCAGTAAAAGTTGATTACAAGTAACGA
c      TCTGTACTTTATCAAGGACAGTAATTAGTTCAGTCAGTAAAAGTTGATTACAAGTAACGA
m      TCTGTACTTTATCAAGGACAGTAATTAGTTCAGTCAGTAAAAGTTGATTACAAGTAACGA
r      TCTGTACTTTATCAAGGACAGTAATTAGTTCAGTCAGTAAAAGTTGATTACAAGTAACGA
          *****

```

```

h      TAAAGTTAGATTTTT-AGTACTTAATTTTAAAATTTCTTTATTAATAGTAAATTTGTTC
c      TAAAGTTAGATTTTT-AGTACTTAATTTTAAAATTTCTTTATTAATAGTAAATTTGTTC
m      TAAAGTTAGATTTTT-AGTACTTAATTTTAAAATTTCTTTATTAATAGCAAATTTGTCC
r      TAAAGTTAGATTTTTTAGTACTTAATTTTAAAATTTCTTTATTAATAGCAAATTTGTTC
          *****

```

```

h      TTAATATAAATGGTACTATCTACTCTTGTTTTATTGCATATCAGAATAATTTAAAGAACA
c      TTAATATAAATGGTACTATCTACTCTTGTTTTATTGCATATCAGAATAATTTAAAGAACA
m      TTAATATAAATGGTACTATCTACTCTTGTTTTATTGCCTATCAGAATAATTTAAAGAACA
r      TTAATATAAACGGTGCTCTCTACTCTGTTTATTGCCTATCAGAATAATTTAAAGGACA
          *****

```

```

h      ATGTGTTCAATGCAGAGTATAATCAAGCGATTTATATATTATGGGTAAGTTTCTATGTAG
c      ATGTGTTCAATGCAGAGTATAATCAAGCGATTTATATATTATGGGTAAGTTTCTATGTAG
m      ATGTGTCCAATGCAGAGTATAATCAAGCGGTTTGTGTATTGTGGGTAAGTTTCTATGTAG
r      ATGTGTCCAAGCACAGCGTAACCAGGCGTTTATGTATTGTGGGTAAGTTTCTAGGTAG
          *****

```

```

h      TTTTGTAGAAAATGTAATATTATATAATCTTTCTGATGTCATCATTTTT-AGAAGTTAAT
c      TTTTGTAGAAAATGTAATATTATATAATCTTTCTGATGTCATCATTTTT-AGAAGTTAAT
m      TTTTGTAGAAAATGCAATATTATGTAATCTGTCTTATGTCTATCATTTTTCAAAGCTTAGC
r      CTTTGTAGAAAACATAATATTATGTAATCCGCTTATGTCTATCATTTTTCGAAAAGTTTAGC
          *****

```

```

h      AATT-GTCACACTGT---GATAGGT-----TATTGTGGAAGTTTTCTAGTGTTCAGGTA
c      AATT-GTCACACTGT---GATAGGT-----TATTGTGGAAGTTTTCTAGTGTTCAGGTA
m      AATTTTTCACACCGT---GACAACCTGATGATGTTGTGGGAATGTTCTAGTGTTCAGGTA
r      AATTTGTCACACCGTCTGACAGCTCAATGATGTTGTGGGAACGTTCTAGTGTTCAGGTA
          ****  *****  *  *  *  *  *  *****  *  *****

```

# TCF4 exon 10a

## Aligned regions

h chr18:51139749-51140227  
c chr18:51711821-51712299  
m chr18:69752920-69753388  
r chr18:66269376-66269845  
exon 10a sequence identity between h and m: 99%

h TCTCGCGTATGCATTAGGATTTTCGAGCTCCATCAGGGCCGGGCTGCCTTCCAGCTCCGCT  
c TCTCGCGTATGCATTAGGATTTTCGAGCTCCATCAGGGCCGGGCTGCCTTCCAGCTCCGCT  
m TCTCGAGTGCTC----GGCTGCGGCGCTGCAC--AGGCCGGGCCGCCATCCAGC----CT  
r TCTCGAGTGCTC----GGCTGCGGCGCTGCAC--AGGCCGGGCCGCCATCCAGC----CT  
\*\*\*\*\* \*\* \* \*\* \* \* \*\* \* \* \*\* \* \* \* \* \* \* \* \* \* \* \* \* \* \* \* \* \* \*

h GCGCAAAGTTGAGCGTCTGACAGCAGCGCCGCGGCCCTCCCC-GCCCGCCAGGAATGGTC  
c GCGCAAAGTTGAGCGTCTGACAGCAGCGCCGCGGCCCTCCCC-GCCCGCCAGGAATGGTC  
m GCGCGAACTTGAAGCGTCTGACAGCAGCGCCGGGGCCCTCCCC-GCCCGCCAGGAATGGTC  
r GCGCGAACTTGAAGCGTCTGACAGCAGCGCCGCGGCCCTCCCCCGCCCGCCAGGAATGGTC  
\*\*\*\* \* \* \* \* \* \* \* \* \* \* \* \* \* \* \* \* \* \* \* \* \* \* \* \* \* \* \* \* \* \* \* \* \* \*

1 4 1412 13 4 1  
h TCTTCC**TGCTTTGCATATTCACCACGCTTGGCCCGGCCATATGGGAAAATGCAACTGAAG**  
c TCTTCC**TGCTTTGCATATTCACCACGCTTGGCCCGGCCATATGGGAAAATGCAACTGAAG**  
m TCTTCC**TGCTTTGCATATTCACCACGCTTGGCCCGGCCATATGGGAAAATGCAACTGAAG**  
r TCTTCC**TGCTTTGCATATTCACCACGCTTGGCCCGGCCATATGGGAAAATGCAACTGAAG**  
\*\*\*\*\* \* \* \* \* \* \* \* \* \* \* \* \* \* \* \* \* \* \* \* \* \* \* \* \* \* \* \* \* \* \* \* \* \* \*

3 12 21 2 1 1  
h **GAATTGTTGTGAAAAAAGGGACAGCGAGTTTGAATAAAAAGTTGTTAGAGTGGTACTGAG**  
c GAATTGTTGTGAAAAAAGGGACAGCGAGTTTGAATAAAAAGTTGTTAGAGTGGTACTGAG  
m GAATTGTTGTGAAAAAAGGGACAGCGAGTTTGAATAAAAAGTTGTTAGAGTGGTACTGAG  
r GAATTGTTGTGAAAAAAGGGACAGCGAGTTTGAATAAAAAGTTGTTAGAGTGGTACTGAG  
\*\*\*\*\* \* \* \* \* \* \* \* \* \* \* \* \* \* \* \* \* \* \* \* \* \* \* \* \* \* \* \* \* \* \* \* \* \* \*

2 1 0.726 1 0.491 1  
h **GAGAAAAAGAATCCGAGACCATGTACTGCGCATAACCAATCCCGGGCATGGGCGGCAAC**  
c GAGAAAAAGAATCCGAGACCATGTACTGCGCATAACCAATCCCGGGCATGGGCGGCAAC  
m GAGAAAAAGAATCCGAGGCCATGTACTGCGCATAACCAATCCCGGGCATGGGCGGCAAC  
r GAGAAAAAGAATCCGAGGCCATGTACTGCGCATAACCAATCCCGGGCATGGGCGGCAAC  
\*\*\*\*\* \* \* \* \* \* \* \* \* \* \* \* \* \* \* \* \* \* \* \* \* \* \* \* \* \* \* \* \* \* \* \* \* \* \*

4 0.440  
h **TCTTTGATGTACTACTATAATGGGAAAGCGGTAAGCGAATGCGGGCTGCGAGGGGATTT**  
c TCTTTGATGTACTACTATAATGGGAAAGCGGTAAGCGAATGCGGGCTGCGAGGGGATTT  
m TCTTTGATGTACTACTATAATGGGAAAGCGGTAAGCGAATGCGGGCTGCGAGGGGATTT  
r TCTTTGATGTACTACTATAATGGGAAAGCGGTAAGCGAATGCGGGCTGCGAGGGGATTT  
\*\*\*\*\* \* \* \* \* \* \* \* \* \* \* \* \* \* \* \* \* \* \* \* \* \* \* \* \* \* \* \* \* \* \* \* \* \* \*

h TTGACAAGTTTTATTGTCGAGGGATGAGCATCCTAGGTGGTGATCATGTTTGCAAAGT  
c TTGACAAGTTTTATTGTCGAGGGATGAGCATCCTAGGTGGTGATCATGTTTGCAAAGT  
m GGGACAAGTTTTATGGTCACAGGGATGAGCCTTCTAGGCCGAGGAGCATTGTTTGCTAAGT  
r GGGACAAGTTTTATGGTCACAGGGATGAGCCTTCTAGGCCGGGAGCATTGTTTGCTAAGT  
\*\*\*\*\* \* \* \* \* \* \* \* \* \* \* \* \* \* \* \* \* \* \* \* \* \* \* \* \* \* \* \* \* \* \* \* \* \* \*

h TGTGCAGGACTGCCGCACCTTCTCGGTGCCATGAAATATTTATCATTGCAATCCTAA  
c TGTGCAGGACTGCCGCACCTTCTCGGTGCCATGAAATATTTATCATTGCAATCCTAA  
m TGTGCAGGACTGCCGCACCTTCTCGGTGCCATGAAATATTTATCATTGCGAGTCCTAG  
r TGTGCAGGACTGCCGCACCTTCTCGGTGCCATGAAATATTTATCATTGCGAGTCCTAG  
\*\*\*\*\* \* \* \* \* \* \* \* \* \* \* \* \* \* \* \* \* \* \* \* \* \* \* \* \* \* \* \* \* \* \* \* \* \* \*

## TCF4 exon 10b

### Aligned regions

h chr18:51139327-51139667  
 c chr18:51711398-51711739  
 m chr18:69753455-69753790  
 r chr18:66269909-66270246  
 exon 10b sequence identity between h and m: 88%

```
h GAGCTTTAGAGA-GTGGATCCTAGAGCGAAA-GTTTGCAGTCAGGTAAAGTTGAGAGGTG
c GAGCTTTAGAGA-GTGGATCCTAGAGCGAAA-GTTTGCAGTCAGGTAAAGTTGAGAGGTG
m AAGCCCCTGAAA-GTAGATCCAGAGAGAAA-GTTTGCAGTCAGGTGAACCTAGGGGGTT
r AAGCTCCTGAAAAGTAGATCCAGAGAGAAAAGTTTGCAGTCAGGTGAACCTAGGAGGTT
  ***      * * * * * * * * * * * * * * * * * * * * * * * * * * * * * * *
```

```
h GTATGATTT-----TTTTTTTTT-----AAAGAGTTTGG--AAAATCTTATTCCT
c GTATGATTT-----TTTTTTTTT-----AAAGAGTTTGG--AAAATCTTATTCCT
m GTACGATTTAAAATAATACTAATTTTTAAAAAAGGACTTTTGGCAAAA-TTATTTTTGCT
r GTACGATTTAAAATAATACTAATTTT---AAAAGATTTTGGCAAAAATCCTTTTTGCT
  *** *****          * * * * *          * * * * * * * * * * * * * * * * *
```

1

```
h TC-CAAATGACTGTTAGAAAGGAAAAGCAGATATGAGAAGCAGAATTGAGAAAGCCCAAG
c TC-CAAATGACTGTTAGAAAGGAAAAGCAGATATGAGAAGCAGAATTGAGAAAGCCCAAG
m CT-CAAATGATTG----GAAGGAGGAGCAGAT-TATGAAG-AGAAGCTGAGAAAACCCAAG
r TTTCAAATGATTG----GAAGGAGGAGCAGAT-TATGAAG-AGAACCAGAAAAGCCCAAG
  ***** * *          * * * * * * * * * * * * * * * * * * * * * * *
```

```
h TTAGGCTGAGAGGAAATTTGGGGTAAGTTTCTCCCTGGATTGAGGTTTGTGATATCTAA
c TTAGGCTGAGAGGAAATTTGGGGTAAGTTTCTCCCTGGATTGAGGTTTGTGATATCTGA
m TTAGCCTGAGAGAAAATTTGGGGTAAGTTTCACTCCGGATTGAGGTTTGTGCTGTCTGA
r TTAGCCTGAGAGAAAATTTGGGGTAAGTTTCTCTCCGGATTGAGGTTCTGTACTATCTAA
  ***** ***** * * * * * * * * * * * * * * * * * * * * * * *
```

```
h AGTCTTACTAAGTTGGAAGCTTGAGTGCAGTGATAGAGTGAGAGAACTGAAAGGTTA
c AGTCTTACTAAGTTGGAAGCTTGAGTGCAGTGATAGAGTGAGAGAACTGAAAGGTTA
m AGTCTTACTAAGTTGGAACC-----ATGGG--GAGTGGACAATGGATAAGAGATTA
r AGTCTTACTAAGTTGGAACC-----ATGGG--GAGTGGACAAGAGATAAGAGATTA
  ***** * * * * * * * * * * * * * * * * * * * * * * *
```

```
h AAATAGAGCAAACACATAAAA-CTGAGAGATCAAATTAAGGAGTAGATTATATAAGCTTA
c AAATAGAGCAAACACATAAAA-CTGAGAGATCAAATTAAGGAGTAGATTATATAAGCTTA
m AAATAGACCAAAAACTTAAAA-CGGACATATCTGAT---GGAGTAGATTATATAAGCTTG
r AAATAGACCAAAAACTTAAAAACGGACATATCTGAT---GGAGTAGATTATATAAGCTTG
  ***** * * * * * * * * * * * * * * * * * * * * * * *
```

## TCF4 exon 10c

### Aligned regions

h chr18:51120517-51121010  
 m chr18:69771959-69772448  
 r chr18:66,287976-66288465  
 exon 10c sequence identity between h and m: 85%

Note: the respective chimp sequence is not available in the latest March 2006 assembly.

```
h CTAACGGGCTCCAGATGCAGCTTTATCCAGGG-GACGCCTCATGCCTGGTCATTTGGGT
m CTAAGGATGGAGTGGATGTGGCTCACACCAGGATGATGCCTGGAGCCTGGTCATTTGGGT
r CTAGCCATGTTCTAGACGGGGCTCACACCAGGATGATGCCAGAGCCTGGTCATTTGGGT
  ***      * * * * * * * * * * * * * * * * * * * * * * * * * * * * * * *
```

```
h GGCTGGGCTTGTCCCACCTCCCCTTCTTCATGCCCTCCTCCGGTCTCATCTAGGCCCT
m GTCTGGGCTGTCCCACCTCCCCTCCC-CATGTACTCCTCCCAGCCTCCTCCTGGGCCCT
r GGCTGGGCTGTCCCACCTCCCCTCCC-CATGTACTCCTCCCAGCCTTCTCCTAGGCCCT
  * * * * * * * * * * * * * * * * * * * * * * * * * * * * * * *
```

```

                                     1 1
h CCCACCCCTAGGCCAGCCACAGGCCTCACAGCGGACATCTGCGGGTCTGAGTTTCATATA
m CCCACCCCAAGCCAGTCAGGGGCCTCACTGCAGACATCTGCGGGCATGAGGCACATATA
r CCCACCCCAAGTCAGTCCCAGGCCTTCCTGCGGACATCTGCAGGTCTGAGGCACATGTA
***** * * * * * * * * * * * * * * * * * * * * * * * * * * * * * * * *

h TCCAGCATGAAGTTCCTCTCTCCCTCCATTATGAATTCTGGGCTGTGGTCTGCTTGC
m CCCAGCCTGAGGTTGCGTCTCTGCCTCCGCTATGAATTCTGGGCTGTGGTCTGCTCCC
r CCCAGCCCGAGGTTGTCTCCCTGCCTCCGCTATGAATTCTGGGCTGTGGTCTGCTCTG
***** * * * * * * * * * * * * * * * * * * * * * * * * * * * * * * * *

                                     1
h --TCCTTGTGTGCAGATTGAAGTTCATGCTGTCAGCCATGTCTGACCAATCAGCAA
m TGCTCTTGCTGTGCAGATTGCAATTCTGATGCTGTCAGCCATGCCTGACCAATCAGCAA
r -GTCCTTGTCCGTCAGATTGCAATTCTGATGCTGTCAGCCACGCCTGACCAATCAGAGAG
***** * * * * * * * * * * * * * * * * * * * * * * * * * * * * * * * *

                                     0.514                                     1 1
h CAACACCACAGGATGAAATTTAAACAATGCAGATGCTCAGATACAGGGCTATGTTGCCTG
m CACCACCAGGGATGAGACTTAAACAATGCAGATGCTCAAAGGCAGGTTATGTCTCGTG
r CGCCGCTGCGGGATGAACTTAAACAATGCAGATGCTCCAATGCAGGGTTATGTTTCGTG
* * * * * * * * * * * * * * * * * * * * * * * * * * * * * * * * *

h GACCACGAAGGGAAAGCAGAGGTAAGGTGAGAGTCTCCCAAAGTGGTCTATCCTGAGCC
m GACCACGAAGGGAGAGCAGAGGTAAGGTCTCAGTCTCCCAAAGTGGTCTGTCCCAGCC
r GAGCACGAGGGAGAGCAGAGGTAAGGTCTCAGTTCCCAAAGTGGCCTGTCCCAGCC
** ** ** ** ** ** ** ** * * * * * * * * * * * * * * * * * * * * * * * * * * * * * * * *
h TGCTGACTTGACACCTCTGGGCTGCACTG-TGC--TGCTTTGACTTGATGTTACCCA
m TGCTTGGTCTGACACTCCCTAAGCGACACTGCCGC--TGCTCTGCCTCGG-TGCCACC--
r TGCTCGGCCTGACACTTCCTAAGTCATACTGCTGCCCTGCTCTGCCTTGT-TGTCACC--
*** * * * * * * * * * * * * * * * * * * * * * * * * * * * * * * * *

h TTTGCTTTGCACTACTTCTGTCTTCCCTGGCATTACCAGAACTTTTCATTTTAATTCGCT
m --TGCTTTCCCTGCCTTT--CTTCCCTGCCACTCACCAGAACTTTTGCTGCTGCC--C
r --TGCTTTCCC-TACCTTT--CTTCCCTGCCACTCACCAGAACTTTTGTTCCCATCC--C
***** * * * * * * * * * * * * * * * * * * * * * * * * * * * * * * * *

```
