# Supplementary material for: Functional Diversity of Human Basic Helix-Loop-Helix Transcription Factor TCF4 Isoforms Generated by Alternative 5′ Exon Usage and Splicing
Source: PubMed Central journal article supplement (PMC3137626; doi:10.1371/journal.pone.0022138), 2011-07-15
Supplement: pone.0022138.s003.pdf [file pone.0022138.s003.pdf]

Supporting Table S1. Accession numbers of representative mRNA or EST sequences for alternative *TCF4* transcripts and complete coding sequences of *TCF4* isoforms cloned in full-length in this study.

| <b>Transcripts with alternative 5' exons</b> |                          |                          |
|----------------------------------------------|--------------------------|--------------------------|
| <b>Transcript</b>                            | <b>Human</b>             | <b>Mouse</b>             |
| 1a                                           | <a href="#">CD557562</a> |                          |
| 1aΔ3                                         | FR748202                 |                          |
| 1b(1)                                        | <a href="#">BC031056</a> |                          |
| 1b(1)Δ3                                      | <a href="#">DB055535</a> |                          |
| 1b(1, 2)                                     | FR748203                 |                          |
| 1b(1, 2)Δ3                                   | <a href="#">DB443719</a> |                          |
| 1b(2)                                        | <a href="#">DB040143</a> |                          |
| 1b(2)Δ3                                      | FR748204                 |                          |
| 3a                                           | FR748205                 |                          |
| 3aΔ3                                         | <a href="#">DC398422</a> |                          |
| 3b                                           | <a href="#">AK315074</a> | <a href="#">AK133885</a> |
| 3bΔ3                                         | <a href="#">AK299169</a> | <a href="#">AK051958</a> |
| 3c                                           | <a href="#">DB106801</a> | <a href="#">AK081012</a> |
| 3cΔ3                                         | FR748206                 |                          |
| 3d                                           | <a href="#">M74719</a>   | <a href="#">X91753</a>   |
| 3dΔ3                                         | <a href="#">BP206418</a> |                          |
| 4a-I                                         | <a href="#">BP293388</a> |                          |
| 4a-II                                        | <a href="#">DC337265</a> |                          |
| 4a-III                                       | <a href="#">DC390184</a> |                          |
| 4b                                           | <a href="#">BI544467</a> |                          |
| 4c                                           | <a href="#">DC358747</a> | <a href="#">CJ115804</a> |
| 5a-I                                         | <a href="#">AU279553</a> |                          |
| 5a-II                                        | FR748207                 |                          |
| 5b                                           | <a href="#">AK096862</a> |                          |
| 5c                                           | <a href="#">DC398249</a> |                          |
| 7a-I                                         | <a href="#">DC358599</a> |                          |
| 7a-II                                        | <a href="#">AK300612</a> | <a href="#">BY247629</a> |
| 7a-III                                       | <a href="#">DC375084</a> |                          |
| 7b-I                                         | <a href="#">AK095041</a> |                          |
| 7b-II                                        | <a href="#">DC350124</a> | <a href="#">CD350230</a> |
| 8a                                           | <a href="#">AK316165</a> | <a href="#">BY286412</a> |
| 8b-I                                         | FR748208                 |                          |
| 8b-II                                        | <a href="#">AK300636</a> | <a href="#">BY252182</a> |
| 8c-I                                         | <a href="#">DC326149</a> |                          |
| 8c-II                                        | FR748209                 | <a href="#">BB663894</a> |
|                                              | <a href="#">CA393351</a> |                          |
| 8d                                           | <a href="#">BP230382</a> |                          |
| 10a                                          | <a href="#">AK300038</a> | <a href="#">U16321</a>   |
| 10b                                          | <a href="#">BP214032</a> | <a href="#">BU058820</a> |
| 10c                                          | <a href="#">DA664480</a> | <a href="#">BY333068</a> |

| <b>Transcripts with alternative internal splicing</b> |                          |                          |
|-------------------------------------------------------|--------------------------|--------------------------|
| <b>Transcript</b>                                     | <b>Human</b>             | <b>Mouse</b>             |
| 8-9 present                                           | <a href="#">DB106801</a> | <a href="#">AK133885</a> |
| Δ8-9                                                  | <a href="#">AK315074</a> |                          |
| 8 (acceptor I) 130 bp                                 | <a href="#">AK096862</a> | <a href="#">AK133885</a> |
| 8 (acceptor II) 127 bp                                | <a href="#">AK095041</a> | <a href="#">BY259217</a> |
| 15 (acceptor I) 77 bp                                 | <a href="#">M74718</a>   | <a href="#">AK133885</a> |
| 15 (acceptor II) 74 bp                                | <a href="#">CN404346</a> | <a href="#">BE652641</a> |
| 18 <sup>-</sup> (donor I) 151 bp                      | <a href="#">AK316165</a> | <a href="#">U16321</a>   |
| 18 <sup>+</sup> (donor II) 163 bp                     | <a href="#">AK315074</a> | <a href="#">AK133885</a> |

| <b>Full-length coding sequences</b> |              |
|-------------------------------------|--------------|
| <b>Isoform</b>                      | <b>Human</b> |
| TCF4-B <sup>+</sup>                 | FR748210     |
| TCF4-B <sup>-</sup>                 | FR748211     |
| TCF4-B <sup>+</sup> Δ               | FR748212     |
| TCF4-B <sup>-</sup> Δ               | FR748213     |
| TCF4-C <sup>-</sup>                 | FR748214     |
| TCF4-C <sup>-</sup> Δ               | FR748215     |
| TCF4-E <sup>-</sup>                 | FR748216     |
| TCF4-F <sup>-</sup>                 | FR748217     |
| TCF4-G <sup>-</sup>                 | FR748219     |
| TCF4-D <sup>-</sup>                 | FR748218     |
| TCF4-A <sup>+</sup>                 | FR748220     |
| TCF4-A <sup>-</sup>                 | FR748221     |
| TCF4-H <sup>-</sup>                 | FR748222     |
| TCF4-I <sup>-</sup>                 | FR748223     |

The nucleotide sequences deposited by this study are under Accession Numbers FR748202-FR748223.
