# Supplementary material for: Functional Diversity of Human Basic Helix-Loop-Helix Transcription Factor TCF4 Isoforms Generated by Alternative 5′ Exon Usage and Splicing
Source: PubMed Central journal article supplement (PMC3137626; doi:10.1371/journal.pone.0022138), 2011-07-15
Supplement: pone.0022138.s004.pdf [file pone.0022138.s004.pdf]

Supporting Table S2. List of oligonucleotides used in this study.

| Specificity | Forward primer (5'-3')      | Reverse primer (5'-3')    | Products (bp)                | T <sub>m</sub> (°C) | Notes |
|-------------|-----------------------------|---------------------------|------------------------------|---------------------|-------|
| 1a-8        | GAGGCATGAGAGCGAGCAAG        | GTTTGGTGGGCGAAAAGGGTTCC   | 536, 444                     | 60                  | 37    |
| 1-5         | AGAACATTATCTCTTGGACGGGCA    | GGACCTGAGCTACTTCTGTCTTC   | 260, 168 (381, 289)          | 59                  | 35    |
| 1b, 2-5     | AGGAGGCCCTTGGAGATGGAG       | GGACCTGAGCTACTTCTGTCTTC   | 330, 238                     | 61                  | 35    |
| 3a-8        | AGACAGGAATCTTCACCATGTGTG    | GTTTGGTGGGCGAAAAGGGTTCC   | 530, 438                     | 59                  | 37    |
| 3b-5        | CCCGGATGTGAATGGATTACAATG    | GGACCTGAGCTACTTCTGTCTTC   | 689, 597                     | 59                  | 40    |
| 3c-5        | CTGTTCAGGCTTCAGATTGTAAGT    | GGACCTGAGCTACTTCTGTCTTC   | 239, 147                     | 57                  | 37    |
| 3d-5        | GGTTAGACATGAACGCCGCCTC      | GGACCTGAGCTACTTCTGTCTTC   | 258, 166                     | 59                  | 37    |
| 4aI-5       | CCCCTTTCTGCTTGTTCACCTTTC    | GGACCTGAGCTACTTCTGTCTTC   | 169                          | 59                  | 40    |
| 4aIII-11    | GCTCTCCTGTTAGAGACGAAATGAG   | TGGATGCAGGCTACAGTAGCTG    | 739                          | 59                  | 40    |
| 4b-5        | GAGATGGAAATGGACATTGCCACG    | GGACCTGAGCTACTTCTGTCTTC   | 138                          | 57                  | 40    |
| 4c-11       | AGCTCTGAAGGCACAAGTGTC       | TGGATGCAGGCTACAGTAGCTG    | 762                          | 57                  | 37    |
| 5a-11       | GGGAGCTTTCCCTGACATTCTTTC    | TGGATGCAGGCTACAGTAGCTG    | 665                          | 59                  | 40    |
| 5b-11       | CATGGAGCACAGGAGAGTAACAAG    | TGGATGCAGGCTACAGTAGCTG    | 800                          | 59                  | 40    |
| 5c-11       | CTGGAGGGTAAATACGGTCATTCC    | TGGATGCAGGCTACAGTAGCTG    | 743                          | 55                  | 45    |
| 7a-8        | CCTCGGCGTGCTACCCATAAG       | GTTTGGTGGGCGAAAAGGGTTCC   | 185, 159, 147                | 57                  | 37    |
| 7b-8        | TCTTGCTTGATACATTGCCAG       | GTTTGGTGGGCGAAAAGGGTTCC   | 160, 262                     | 59                  | 40    |
| 8a-11       | TTACAGCCATTCCAGCGCAAC       | TGGATGCAGGCTACAGTAGCTG    | 444                          | 59                  | 40    |
| 8b-11       | CTTGTGAAAGCATCATCCAGACCG    | TGGATGCAGGCTACAGTAGCTG    | 542                          | 57                  | 40    |
| 8cI-11      | AGAGGTGGATGGATTGGCATGTG     | TGGATGCAGGCTACAGTAGCTG    | 457, 956                     | 59                  | 40    |
| 8cII-11     | CAGCTGAAATGATTCCCCACTGTG    | TGGATGCAGGCTACAGTAGCTG    | 439                          | 57                  | 40    |
| 8d-11       | GTCAGTAAAAGTTGATTACAAGTAACG | TGGATGCAGGCTACAGTAGCTG    | 599                          | 57                  | 40    |
| 10a-11      | ACCATGTACTGCGCATACACAATC    | TGGATGCAGGCTACAGTAGCTG    | 300                          | 57                  | 37    |
| 10b-11      | GAGAAAGCCCAAGTTAGGCTGAG     | TGGATGCAGGCTACAGTAGCTG    | 263                          | 59                  | 40    |
| 10c-11      | GCTATGTTGCCTGGACCACGA       | TGGATGCAGGCTACAGTAGCTG    | 262                          | 57                  | 40    |
| 5-11        | AGAAGACAGAAGTAGCTCAGGGTC    | TGGATGCAGGCTACAGTAGCTG    | 628, 448                     | 57                  | 35    |
| 10-20       | TATGCTCCATCAGCAAGCACTG      | CATCTGTCCCATGTGATTCGATGCG | 1461 (BglIII:1090+371), 1449 | 57                  | 35    |
| 10-11       | TATGCTCCATCAGCAAGCACTG      | TGGATGCAGGCTACAGTAGCTG    | 225                          | 61                  | q     |
| 17-18       | GCCATTCTCTTCTGCCAAACCA      | TCATCACCTCGTCATCGGATT     | 172                          | 60                  | q     |
| 19-20       | TCCTCAGTCTGGAGCAGCAA        | TCGATGCGTCTCCCATCCA       | 144                          | 56                  | q     |

| Specificity | Forward primer (5'-3')                              | Reverse primer (5'-3')                                        | Products (bp) | Tm (°C) | Notes |
|-------------|-----------------------------------------------------|---------------------------------------------------------------|---------------|---------|-------|
| HPRT1       | CAGTCCCAGCGTCGTGATTA                                | AGCAAGTCTTTCAGTCCTGTC                                         | 141           | 58      | q     |
| GAPDH*      | TGCACCACCAACTGCTTAGC                                | GGCATGGACTGTGGTCATGAG                                         | 87            | 60      | q     |
| HMBS*       | GGCAATGCGGCTGCAA                                    | GGGTACCCACGCGAATCAC                                           | 64            | 58      | q     |
| SDHA*       | TGGGAACAAGAGGGCATCTG                                | CCACCACTGCATCAAATTCATG                                        | 86            | 58      | q/32  |
| UBC         | GATTTGGGTTCGAGTTCTTG                                | CTCGATGGTGTCACTGGGCTCA                                        | 122           | 58      | q     |
| 3-11 (RPA)  | caccATGCATCACCAACAGCGAATGG                          | TGGATGCAGGCTACAGTAGCTG                                        | 777+4 (597+4) |         | c     |
| 10-16 (ISH) | CTCCATCAGCAAGCACTG                                  | GTTCCATACCCTGAGCCAGAC                                         | 760           |         | c     |
| 8-9 (NLS)   | ctaagatctaCCCCGAAGGAGGCCTCTTCA                      | cacggtaccGGAGGAACTTTTCGAACTTTC                                | 68+19         |         | c     |
| TCF4 NLS m1 | TCTAGCAATAATCCCgCgCgCgCCTCTTCA<br>CAGTAGT           | ACTACTGTGAAGAGGCgCgCgCgGGGATT<br>ATTGCTAGA                    |               |         | m     |
| TCF4 NLS m2 | CATGGAGGTACAGACAgcGgcAGTTgCgCgCg<br>TTCCTCCAGTTTTG  | CAAACCTGGAGGAACTgCgCgCAACTgCgCgC<br>TGCTGTACCTCCATG           |               |         | m     |
| 3×μE5       | CTAGAGATCTGAACACCTGCAAGAACACCTGC<br>AAGAACACCTGCAAG | GATCCTTGCAGGTGTTCTTGCAGGTGTTCT<br>TGCAGGTGTTTTCAGATCTCTAGAGCT |               |         | a     |

  

| Specificity | Forward primer (5'-3')           | Reverse primer (5'-3')         | Isoform | Notes |
|-------------|----------------------------------|--------------------------------|---------|-------|
| 3           | caccATGCATCACCAACAGCGAATGG       |                                | TCF4-B  | c     |
| 4           | tcgaaattcaccATGTTTTACCTCCTGTGAGC |                                | TCF4-C  | c     |
| 3c          | caccATGCAACGGGCAAAAACCTGAAC      |                                | TCF4-E  | c     |
| 5b, 5       | caccATGGAAGAGGACAGCAGAGATGTA     |                                | TCF4-F  | c     |
| 8           | tcgaaattcaccATGGATATGGGCAACCCAG  |                                | TCF4-D  | c     |
| 7b          | caccATGAAGGATATTTTTTCCAGTTTATC   |                                | TCF4-G  | c     |
| 10a         | cACCATGTACTGCGCATAACAATC         |                                | TCF4-A  | c     |
| 10c         | caccATGAAATTTAAACAATGCAGATGCTC   |                                | TCF4-H  | c     |
| 10, 11      | cacCATGCAAGATGGCCATCACAG         |                                | TCF4-I  | c     |
| 20          |                                  | CATCTGTCCCATGTGATTTCGATGCG     | all     | c     |
| 20stop      |                                  | ctgagctcTcACATCTGTCCCATGTGATTC | all     | c     |
| 21          |                                  | ccactcgaGCGTCTGCGATTCATAACTAC  | all     | c     |

  

| Specificity | Forward siRNA (5'-3') | Reverse siRNA (5'-3')  | Species specificity | Notes |
|-------------|-----------------------|------------------------|---------------------|-------|
| 12 (I)      | ACCAUUCAGCACCCUCUUCtt | GAAGAGGUGUCUGUAAUGGUTT | human and mouse     | si    |
| 12 (II)     | CGGAACAGACAGUAUAAUGtt | CAUUAUACUGUCUGUUCGTT   | mouse               | si    |
| 20          | GAAGGGAGGAAGAGAAGGUtt | ACCUUCUCUUCUCCCUUCTT   | human and mouse     | si    |

The oligonucleotides were used for detection of TCF4 transcripts and housekeeping gene transcripts by RT-PCR, amplification of TCF4 coding sequences and fragments for cRNA probe synthesis for cloning, site-directed mutagenesis of TCF4 coding sequence, and annealing of μE5 E-boxes. TCF4 primer pairs are designated with the exon range spanned by the amplified product. For clarity TCF4 PCR product lengths are given only for transcripts containing longer variants of exons 8 and 15. In the 'Notes' column, the number of cycles is given for the primer pairs used for end-point PCR analysis; primers used for quantitative PCR, cloning or annealing are indicated with 'q', 'c' or 'a', respectively; siRNAs are indicated with 'si'. Primers marked with asterisk (\*) have been described before [55]. Nucleotides in lowercase indicate adapter sequences (CACC Kozak consensus and restriction sites) or mutated positions.
